# Supplementary material for: Need factors for utilisation of institutional delivery services in Nepal: an analysis from Nepal Demographic and Health Survey, 2011
Source: PubMed Central journal article supplement — BMJ Open. 2014 Mar 20;4(3):e004372. doi: 10.1136/bmjopen-2013-004372 (PMC3963088; doi:10.1136/bmjopen-2013-004372), 2014-03-20
Supplement: bmjopen-2013-004372.draft_revisions.pdf [file bmjopen-2013-004372.draft_revisions.pdf]

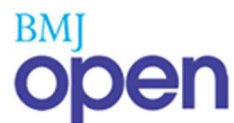

## Need factors for utilisation of delivery services in Nepal

|                                 |                                                                                                                                                                                                                               |
|---------------------------------|-------------------------------------------------------------------------------------------------------------------------------------------------------------------------------------------------------------------------------|
| Journal:                        | <i>BMJ Open</i>                                                                                                                                                                                                               |
| Manuscript ID:                  | bmjopen-2013-004372                                                                                                                                                                                                           |
| Article Type:                   | Research                                                                                                                                                                                                                      |
| Date Submitted by the Author:   | 31-Oct-2013                                                                                                                                                                                                                   |
| Complete List of Authors:       | Karkee, Rajendra; BP Koirala Institute of Health Sciences, School of Public Health and Community Medicine<br>Lee, Andy; Curtin University, School of Public Health<br>Khanal, Vishnu; Sanjeevani College of Medical Sciences, |
| <b>Primary Subject Heading</b>: | Epidemiology                                                                                                                                                                                                                  |
| Secondary Subject Heading:      | Epidemiology, Public health                                                                                                                                                                                                   |
| Keywords:                       | EPIDEMIOLOGY, Health policy < HEALTH SERVICES ADMINISTRATION & MANAGEMENT, International health services < HEALTH SERVICES ADMINISTRATION & MANAGEMENT                                                                        |
|                                 |                                                                                                                                                                                                                               |

SCHOLARONE™  
Manuscripts

## Need factors for utilisation of delivery services in Nepal

Rajendra Karkee\*, Andy H. Lee, Vishnu Khanal

Rajendra Karkee\*

School of Public Health and Community Medicine, BP Koirala Institute of Health Sciences,

Dharan, Nepal

E-mail: rkarkee@gmail.com

Andy H. Lee

School of Public Health, Curtin University, Perth, WA, Australia

E-mail: Andy.Lee@curtin.edu.au

Vishnu Khanal

Sanjeevani College of Medical Sciences, Butwal, Rupandehi, Nepal

E-mail: khanal.vishnu@gmail.com

### \* Corresponding author

School of Public Health and Community Medicine, BP Koirala Institute of Health Sciences,

Dharan, Nepal

Phone: +977 98420 64635

E-mail: rkarkee@gmail.com

**Keywords:** birth preparedness, facility delivery, maternity service, need factors, Nepal

**Word count:** 2149

## ABSTRACT

**Objectives:** This study aims to assess the role of need factors with respect to the utilisation of delivery services in Nepal.

**Design:** An analytic study was conducted using a subset of 4079 ever married women from the 2011 Nepal Demographic and Health Survey, which utilised two-stage cluster sampling.

**Outcome measures:** perceived need assessed by frequency of antenatal care visits and birth preparedness activities

**Results:** Overall facility delivery rate was low at 36.9%. Only half (50.1%) of the women made four or more antenatal care visits while 62.9% did not indicate any of the four birth preparation activities. Women who made more than four antenatal care visits were five times more likely to deliver at a health facility when compared to those who paid no visit (adjusted OR 4.94, 95% CI 3.14 to 7.76). Similarly, the likelihood for facility delivery increased by 3.4 fold among women who prepared for at least two of the four activities compared to their counterparts who made no preparation (adjusted OR 3.41, 95% CI 2.01 to 5.58).

**Conclusion:** The perceived need, as expressed by the frequency of antenatal care visits and birth preparedness activities, plays an important role in delivery service utilisation for Nepalese women. For behavioural interventions to be effective in safe motherhood programs, they must be capable of convincing the women to give birth at a health facility.

## Article Summary

### Strength and limitations

- This study used the nationally representative large sample of married women from 2011 NDHS survey with a high response rate.
- A major limitation of this study is that information was not available on some known determinants of facility delivery utilisation, particularly quality of providers and distance and transportation to facility.
- Perceived need of facility delivery was assessed by antenatal visits and birth preparedness activities, which were positively associated with facility delivery utilisation.

## INTRODUCTION

Globally, nearly all (99%) maternal deaths occur in developing countries, mainly caused by non-utilisation of available delivery services or delays in accessing such services.<sup>1,2</sup> A number of interventions have been implemented to increase the rate of facility delivery and access to emergency obstetric care, including the establishment of birth centres and maternity waiting homes, reduction of user fees, provision of incentives and birth preparedness packages.<sup>3,4</sup> However, about half of all births in South Asia still occur at home.<sup>5</sup> In particular, 65% of births take place at home in Nepal.<sup>6</sup>

According to the behavioural model proposed by Andersen, need factors are fundamental to healthcare seeking behaviour; that is, one should perceive a condition as susceptible and severe enough before seeking care to gain benefits.<sup>7</sup> For delivery service utilisation, this means the pregnant woman and her family must recognise pregnancy and childbirth as abnormal events, so that life threatening situations may arise without any prediction.<sup>8</sup> In many developing countries including Nepal, pregnancy and child birth are often perceived as normal life events without justification to seek professional help.<sup>9,10</sup> In fact, need factors can be driven by pregnancy related factors such as awareness, health knowledge of pregnancy and risk, importance given to pregnancy, community customs, previous facility use, parity, and pregnancy complications.<sup>11</sup> Those women who perceive the need of professional help and recognise the risk of pregnancy and delivery are expected to make antenatal visits and prepare and arrange for childbirth. Besides the immediate need, utilisation of delivery service can be affected by predisposing and enabling factors as well as external environment factors, as depicted by the conceptual framework in Figure 1, which is adapted from Andersen's behavioural model for the utilisation of health services.<sup>7</sup>

1  
2  
3 Despite the important role of need factors, their effect on utilisation of delivery service has  
4  
5 seldom been investigated in the context of safe motherhood programs. The aim of the present  
6  
7 study is to assess the contribution of need factors with respect to the utilisation of delivery  
8  
9 service in Nepal, using data from the national Nepal Demographic Health Survey (NDHS).  
10  
11

## 12 13 14 **METHODS**

### 15 16 **Study setting**

17  
18 Nepal, with a population of 27.5 million, is divided into five developmental regions, each  
19  
20 extending from north to south. The country has also three ecological zones across east to  
21  
22 west: Terai, Hill and Mountain. These 15 sub-ecological regions are further divided into  
23  
24 smaller districts. Typically, each district has Village Development Committees (VDC) in  
25  
26 rural areas and municipalities in urban areas. Each VDC or municipality in turn consists of  
27  
28 small administrative units known as wards.  
29  
30  
31  
32  
33

### 34 35 **Data and sampling**

36  
37 The data for this study were obtained from the 2011 NDHS conducted by the Ministry of  
38  
39 Health and Population. The 2011 NDHS survey was approved by Nepal Health Research  
40  
41 Council and data were accessible from MEASURE DHS project on request. Permission to  
42  
43 use the data was obtained by the authors. Details of the sampling methodology had been  
44  
45 described elsewhere.<sup>6</sup> Briefly, the survey utilised a two-stage cluster sampling method with  
46  
47 wards (enumeration areas) being the primary sampling units. The wards were stratified by  
48  
49 sub-ecological domains and by rural-urban residency. In total, 11,085 households were  
50  
51 selected as listing units from these 289 wards. Among them, 12,961 women aged 15-49 years  
52  
53 were identified as eligible but individual interviews were only completed for 12,699 women,  
54  
55  
56  
57  
58  
59  
60

1  
2  
3 giving a response rate of 98%. This study focused on the subset of 4079 ever married women  
4  
5 who had given birth within the past five years preceding the survey.  
6  
7

### 8 9 10 **Statistical analysis**

11 The outcome variable was ‘place of delivery’: home versus facility (private or public). This  
12  
13 binary variable was chosen instead of ‘assisted deliveries’ to emphasize the use of delivery  
14  
15 services and to avoid potential problem of inaccurate reporting of birth attendant skills.  
16  
17 Perceived need factors investigated were (1) frequency of antenatal care visits and (2) birth  
18  
19 preparedness. The latter referred to four preparation activities, namely, planning for a birth  
20  
21 attendant, saving money, arrangement for transportation, and identification of potential blood  
22  
23 donator. Although the 2011 NDHS collected information on planning activities related to  
24  
25 preparation of clothes, delivery kit and food, these activities did not necessarily imply the  
26  
27 need for facility delivery; consequently, they were not considered as need factors.  
28  
29  
30  
31

32  
33  
34 Table 1 gives the classification of variables used in this study. These variables were chosen in  
35  
36 view of the conceptual framework of factors associated with utilisation of delivery services  
37  
38 (Figure 1). NDHS applied principal component analysis of a range of household assets to  
39  
40 generate wealth quintiles. Ethnicity was categorised by three groups: upper caste (Hill  
41  
42 Brahmin, Hill Cheetri, Terai Brahmin, Terai Cheetri), lower caste (Hill Dalit, Terai Dalit) and  
43  
44 other (all other recorded ethnicities). Education was classified as none, primary (1-5 grade),  
45  
46 secondary (6-10 grade), and higher (after 10<sup>th</sup> grade).  
47  
48  
49

50  
51  
52 In the 2011 NDHS, enumeration areas were not allocated proportional to their population  
53  
54 size, thus requiring adjustment by sampling weights prior to analysis. Such sampling weights  
55  
56 were provided by the survey to account for cluster level variables and strata (domain) level  
57  
58  
59  
60

variables. Based on these sampling weights, a complex sampling plan file was then prepared to perform logistic regression modelling, with need factors and other confounding factors listed in Table 1. All statistical analyses were conducted in the SPSS package version 21.

Table 1: Classification of variables used in the analysis (n=4079)

| Variables                    | categories | Weighted percentage |
|------------------------------|------------|---------------------|
| <b>Place of delivery</b>     | Home       | 63.1                |
|                              | Facility   | 36.9                |
| <b>Antenatal care visits</b> | 0          | 15.2                |
|                              | 1          | 6.1                 |
|                              | 2          | 12.2                |
|                              | 3          | 16.4                |
|                              | 4          | 19.7                |
| <b>Birth preparedness</b>    | ≥ 5        | 30.4                |
|                              | 0          | 62.9                |
|                              | 1          | 33.3                |
| <b>Age (years)</b>           | ≥ 2        | 3.8                 |
|                              | 15-19      | 7.1                 |
|                              | 20-24      | 33.4                |
|                              | 25-29      | 32.2                |
| <b>Education</b>             | 30-49      | 27.3                |
|                              | None       | 47.3                |
|                              | Primary    | 20.0                |
|                              | Secondary  | 27.2                |



|                             |             |      |
|-----------------------------|-------------|------|
|                             | Higher      | 5.5  |
| <b>Partner Education</b>    | None        | 23.2 |
|                             | Primary     | 24.5 |
|                             | Secondary   | 42.1 |
|                             | Higher      | 10.2 |
| <b>Parity</b>               | 1           | 24.2 |
|                             | 2           | 30.6 |
|                             | 3           | 19.3 |
|                             | 4           | 10.8 |
|                             | ≥ 5         | 15.1 |
| <b>Wealth quintiles</b>     | 1           | 25.8 |
|                             | 2           | 21.9 |
|                             | 3           | 21.0 |
|                             | 4           | 17.4 |
|                             | 5           | 13.9 |
| <b>Ethnicity</b>            | Other       | 52.1 |
|                             | Lower caste | 17.8 |
|                             | Upper caste | 30.1 |
| <b>Region</b>               | Mountain    | 7.9  |
|                             | Hill        | 39.5 |
|                             | Terai       | 52.6 |
| <b>Residential location</b> | Rural       | 90.7 |
|                             | Urban       | 9.3  |

---

## RESULTS

Table 1 shows the characteristics of the 4079 eligible women. About half of the participants had no education (47.3%) and came from the Terai region (52.6%). Almost two-third of them were between 20-29 years of age. Although half (50.1%) of the women made four or more antenatal care visits, 15.2% of women never visited a health facility before giving birth. The majority of mothers (62.9%) did not indicate any of the four birth preparation activities, while no women prepared for all four activities.

The overall facility delivery rate was found to be 36.9%. Table 2 presents the results of logistic regression analysis. Both need factors were positively associated with the facility delivery status. Even after adjusting the effects of predisposing, enabling, and external environment factors, the two need factors remained statistically significant ( $p < 0.001$ ). In particular, women who made five or more antenatal care visits were almost five times more likely to deliver at a health facility when compared to those who paid no visit prior to delivery (adjusted odds ratio (OR) 4.94, 95% confidence interval (CI) 3.14 to 7.76). Similarly, the likelihood for facility delivery increased by 3.4 fold among women who prepared for at least two of the four activities, relative to their counterparts who chose to make no preparation (adjusted OR 3.41, 95% CI 2.01 to 5.58).

Table 2 Crude and adjusted odds ratio of facility delivery, NDHS 2011 (n=4079)

|                              | Crude OR (95% CI)    | Adjusted OR <sup>#</sup> (95% CI) | p       |
|------------------------------|----------------------|-----------------------------------|---------|
| <b>Antenatal care visits</b> |                      |                                   |         |
| 0                            | 1                    | 1                                 | < 0.001 |
| 1                            | 1.79 (1.03, 3.10)    | 1.30 (0.72, 2.34)                 |         |
| 2                            | 2.58 (1.62, 4.10)    | 1.75 (1.07, 2.93)                 |         |
| 3                            | 4.18 (2.69, 6.50)    | 2.21 (1.39, 3.43)                 |         |
| 4                            | 8.71 (5.40, 14.05)   | 4.13 (2.51, 6.44)                 |         |
| ≥ 5                          | 17.89 (11.23, 28.51) | 4.94 (3.14, 7.76)                 |         |
| <b>Birth preparedness</b>    |                      |                                   |         |
| 0                            | 1                    | 1                                 | < 0.001 |
| 1                            | 2.68 (2.18, 3.30)    | 1.52 (1.19, 1.88)                 |         |
| ≥ 2                          | 9.31 (5.71, 15.17)   | 3.41 (2.01, 5.58)                 |         |

<sup>#</sup> adjusted for age, education, partner education, parity, wealth quintiles, ethnicity, region and residential location.

## DISCUSSION

The national survey data revealed the majority of Nepalese mothers did not prepare any of the four activities and only half of the women made the recommended 4 or more antenatal care visits, which suggested that they had no intention or did not perceive the need of giving birth at a health facility. Indeed, the facility delivery rate was found to be only 36.9%. In the traditional Nepalese society, childbirth continues to take place at home, while many women still hold the view that facility delivery is unnecessary. On the other hand, those women who were prepared and made antenatal visits tended to give birth at facilities. Our results confirmed the strong contribution by these need factors to actual facility utilisation irrespective of predisposing, enabling, and external environment factors.

Although the frequency of antenatal care visits was associated with subsequent facility delivery, the relationship appeared to be dose-dependent,<sup>11, 12</sup> as in the case of the present study whereby making a single visit induced no significant impact; whereas previous studies undertaken in Tanzania observed high use of antenatal care but low use of facility delivery.<sup>13, 14</sup> Making the recommended four or more antenatal care visits might reflect the woman's concern of her pregnancy, pregnancy complications and the need for professional help.

The link between birth preparedness activities and facility delivery was supported by recent literature. A prospective cohort study of 701 pregnant women in the Kaski district of Nepal found preparation activities could increase the facility delivery rate.<sup>12</sup> Similarly, a randomised trial in Tanzania demonstrated that skilled delivery care uptake was 16.8% higher among women who had been counselled on promotion of birth plan than others without such counselling.<sup>15</sup> Raising awareness and help for birth plan also led to increased facility

1  
2  
3 utilisation in other intervention studies conducted in Burkina Faso, Bangladesh and Eritrea.

4  
5 16-18  
6  
7  
8

9  
10 The findings have important implications for safe motherhood program in Nepal and other  
11 developing countries. Because the intention to deliver at a health facility can be largely  
12 influenced by need factors, women should be extensively counselled and convinced of the  
13 benefits and safety of facility delivery. Any behavioural intervention such as birth  
14 preparedness package and complication readiness is unlikely to be successful unless attaining  
15 a high level capable to change the women's attitude and intention.  
16  
17  
18  
19  
20  
21  
22  
23  
24

25 The strength of the present study was the use of a nationally representative large sample of  
26 married women with a high response rate. However, information was lacking on some known  
27 determinants of facility delivery utilisation, particularly quality of providers and distance and  
28 transportation to facility. These variables were unavailable from the 2011 NDHS database  
29 and posed as the major limitation. Nevertheless, residential location and region have provided  
30 some proxy information to partially compensate the effect of distance and service  
31 availability. Delivery services in Terai and urban areas are more physically accessible than in  
32 hilly or mountainous parts of the country.  
33  
34  
35  
36  
37  
38  
39  
40  
41  
42  
43  
44

## 45 **CONCLUSION**

46  
47 Utilisation of delivery services remained low in Nepal. The majority of mothers were not  
48 prepared for childbirth and only half the women made the recommended four or more  
49 antenatal care visits, indicating their perceived lack of need for facility delivery. The national  
50 data confirmed the strong associations between such need factors and service utilisation.  
51  
52  
53  
54

55  
56 Therefore, for behavioural interventions such as birth preparedness and complication  
57  
58  
59  
60

1  
2  
3 readiness to be effective in safe motherhood programs, they must be capable of changing the  
4  
5 women's intention to deliver at a health facility.  
6  
7

### 8 9 **Acknowledgements**

10 The authors are grateful to the ICF International, Calverton, Maryland, USA, for providing  
11  
12 the data for this study.  
13  
14

### 15 16 **Contributors**

17 RK conceived the study design, did data analysis and drafted the paper. AHD assisted in data  
18  
19 analysis and revision of the paper. VK assisted in data archive and provided comments. All  
20  
21 the three authors read and approved the final version.  
22  
23  
24  
25  
26

### 27 28 **Competing Interests**

29 None declared for all authors.  
30  
31  
32  
33

### 34 35 **Data sharing statement**

36 Data of 2011 Nepal Demographic and Health Survey can be obtained from MEASURE DHS  
37  
38 ICF International, Calverton, Maryland, USA.  
39  
40  
41  
42  
43  
44  
45  
46  
47  
48  
49  
50  
51  
52  
53  
54  
55  
56  
57  
58  
59  
60

## REFERENCES

1. World Health Organization. *Trends in maternal mortality 1990 to 2010*. WHO, UNICEF, UNFPA and World Bank. WHO, Geneva, Switzerland,2012.
2. Ronsmans C, Graham WJ. Maternal mortality: who, when, where, and why. *Lancet* 2006;368(9542):1189-200.
3. Metcalfe R, Adegoke AA. Strategies to increase facility-based skilled birth attendance in South Asia: a literature review. *Int Health* 2013;5(2):96-105.
4. De Brouwere V, Richard F, Witter S. Access to maternal and perinatal health services: lessons from successful and less successful examples of improving access to safe delivery and care of the newborn. *Trop Med Int Health* 2010;15(8):901-9.
5. United Nations. *The Millenium Development goals Report 2013*. New York: United Nations, 2013.
6. MoHP [Nepal], New ERA, ICF International Inc. *Nepal Demographic and Health Survey 2011*. Kathmandu, Nepal and Calverton, Maryland: Ministry of Health and Population [Nepal ], New ERA, and ICF International Inc., 2012.
7. Andersen RM. Revisiting the Behavioral Model and Access to Medical Care: Does it Matter? *J Health Soc Behav* 1995;36(1):1-10.
8. Thaddeus S, Maine D. Too far to walk: Maternal mortality in context. *Soc Sci Med* 1994;38(8):1091-110.
9. Pradhan A, Suvedi BK, Barnett S, et al. *Nepal Maternal Mortality and Morbidity Study 2008/2009*. Ministry of Health and Population, Government of Nepal, Kathmandu, 2010.
10. Agus Y, Shigeko H, Porter SE. Rural Indonesia women's traditional beliefs about antenatal care. *BMC Res Notes* 2012;5:589.

- 1  
2  
3 11. Gabrysch S, Campbell OMR. Still too far to walk: Literature review of the  
4  
5 determinants of delivery service use. *BMC Pregnancy Childbirth* 2009;9:34.  
6
- 7  
8 12. Karkee R, Lee A, Binns C. Birth preparedness and skilled attendance at birth in  
9  
10 Nepal: Implications for achieving Millennium Development Goal 5. *Midwifery*  
11  
12 2013;29(10):1206-10.  
13
- 14 13. Mpembeni RNM, Killewo JZ, Leshabari MT, et al. Use pattern of maternal health  
15  
16 services and determinants of skilled care during delivery in Southern Tanzania:  
17  
18 Implications for achievement of MDG-5 targets. *BMC Pregnancy Childbirth*  
19  
20 2007;7:29.  
21  
22
- 23 14. Magoma M, Requejo J, Campbell O, Cousens S, Filippi V. High ANC coverage and  
24  
25 low skilled attendance in a rural Tanzanian district: a case for implementing a birth  
26  
27 plan intervention. *BMC Pregnancy Childbirth* 2010;10:13.  
28
- 29 15. Magoma M, Requejo J, Campbell O, Cousens S, Merialdi M, Filippi V. The  
30  
31 effectiveness of birth plans in increasing use of skilled care at delivery and postnatal  
32  
33 care in rural Tanzania: a cluster randomised trial. *Trop Med Int Health*  
34  
35 2013;18(4):435-43.  
36  
37
- 38 16. Brazier E, Andrzejewski C, Perkins ME, Themmen EM, Knight RJ, Bassane B.  
39  
40 Improving poor women's access to maternity care: Findings from a primary care  
41  
42 intervention in Burkina Faso. *Soc Sci Med* 2009;69(5):682-90.  
43  
44
- 45 17. Hossain J, Ross SR. The effect of addressing demand for as well as supply of  
46  
47 emergency obstetric care in Dinajpur, Bangladesh. *Int J Gynecol Obstet*  
48  
49 2006;92(3):320-28.  
50  
51
- 52 18. Turan JM, Tesfagiorgis M, Polan ML. Evaluation of a Community Intervention for  
53  
54 Promotion of Safe Motherhood in Eritrea. *J Midwifery Womens Health* 2011;56(1):8-  
55  
56 17.  
57  
58  
59  
60



Figure 1: Conceptual framework of factors associated with the utilisation of delivery services

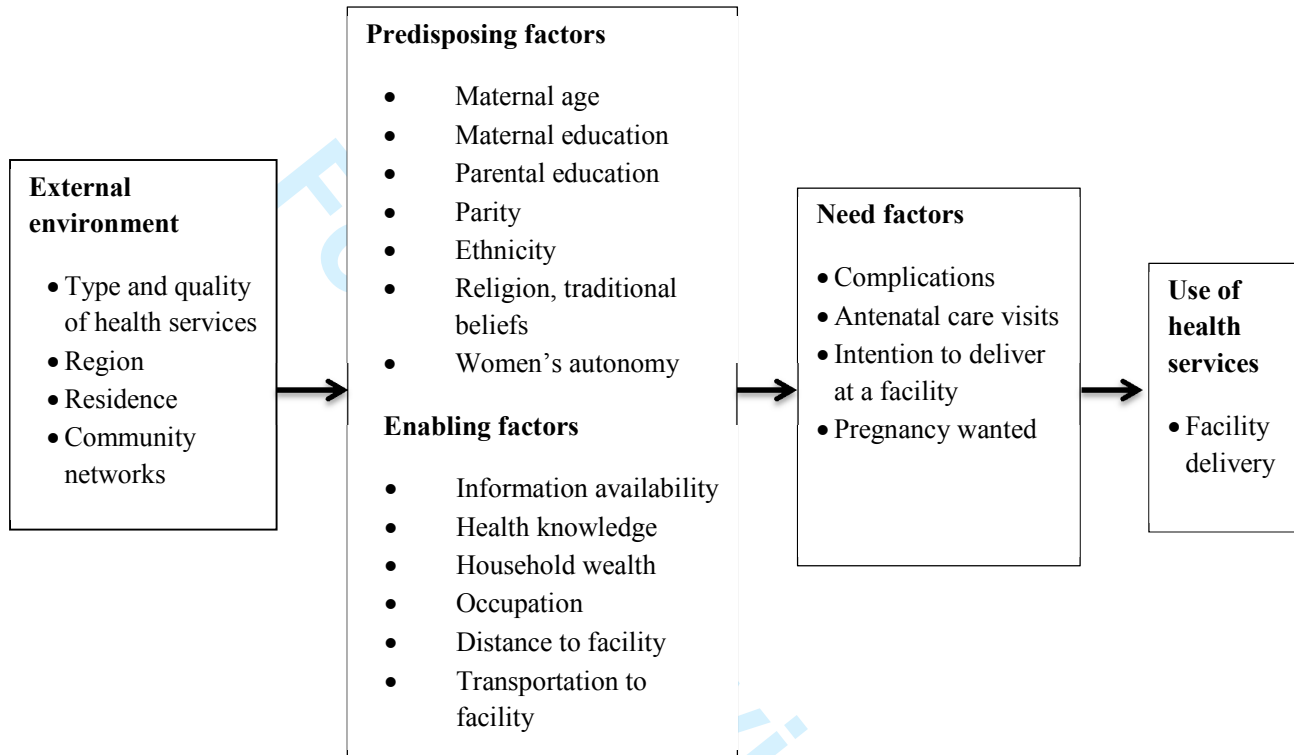

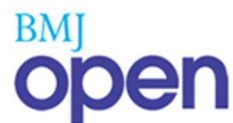

**Need factors for utilisation of institutional delivery services  
in Nepal: an analysis from Nepal Demographic and Health  
Survey, 2011**

|                                 |                                                                                                                                                                                                                               |
|---------------------------------|-------------------------------------------------------------------------------------------------------------------------------------------------------------------------------------------------------------------------------|
| Journal:                        | <i>BMJ Open</i>                                                                                                                                                                                                               |
| Manuscript ID:                  | bmjopen-2013-004372.R1                                                                                                                                                                                                        |
| Article Type:                   | Research                                                                                                                                                                                                                      |
| Date Submitted by the Author:   | 28-Jan-2014                                                                                                                                                                                                                   |
| Complete List of Authors:       | Karkee, Rajendra; BP Koirala Institute of Health Sciences, School of Public Health and Community Medicine<br>Lee, Andy; Curtin University, School of Public Health<br>Khanal, Vishnu; Sanjeevani College of Medical Sciences, |
| <b>Primary Subject Heading</b>: | Epidemiology                                                                                                                                                                                                                  |
| Secondary Subject Heading:      | Epidemiology, Public health                                                                                                                                                                                                   |
| Keywords:                       | EPIDEMIOLOGY, Health policy < HEALTH SERVICES ADMINISTRATION & MANAGEMENT, International health services < HEALTH SERVICES ADMINISTRATION & MANAGEMENT                                                                        |
|                                 |                                                                                                                                                                                                                               |

SCHOLARONE™  
Manuscripts

1  
2  
3 **Need factors for utilisation of institutional delivery services in Nepal: an**  
4  
5 **analysis from Nepal Demographic and Health Survey, 2011**  
6  
7  
8  
9

10 Rajendra Karkee\*, Andy H. Lee, Vishnu Khanal  
11

12  
13  
14  
15 Rajendra Karkee\*

16 School of Public Health and Community Medicine, BP Koirala Institute of Health Sciences,  
17

18 Dharan, Nepal  
19

20 E-mail: rkarkee@gmail.com  
21  
22  
23  
24  
25

26 Andy H. Lee  
27

28 School of Public Health, Curtin University, Perth, WA, Australia  
29

30 E-mail: Andy.Lee@curtin.edu.au  
31  
32  
33  
34

35 Vishnu Khanal  
36

37 Sanjeevani College of Medical Sciences, Butwal, Rupandehi, Nepal  
38

39 E-mail: khanal.vishnu@gmail.com  
40  
41  
42  
43

44 **\* Corresponding author**  
45

46 School of Public Health and Community Medicine, BP Koirala Institute of Health Sciences,  
47

48 Dharan, Nepal  
49

50 Phone: +977 98420 64635  
51

52 E-mail: rkarkee@gmail.com  
53  
54  
55  
56

57 **Keywords:** birth preparedness, facility delivery, maternity service, need factors, Nepal  
58  
59  
60

Word count: 2319

For peer review only

1  
2  
3  
4  
5  
6  
7  
8  
9  
10  
11  
12  
13  
14  
15  
16  
17  
18  
19  
20  
21  
22  
23  
24  
25  
26  
27  
28  
29  
30  
31  
32  
33  
34  
35  
36  
37  
38  
39  
40  
41  
42  
43  
44  
45  
46  
47  
48  
49  
50  
51  
52  
53  
54  
55  
56  
57  
58  
59  
60

**ABSTRACT**

**Objectives:** This study aims to assess the role of need factors with respect to the utilisation of institutional delivery services in Nepal.

**Design:** An analytic study was conducted using a subset of 4079 ever married women from the 2011 Nepal Demographic and Health Survey, which utilised two-stage cluster sampling. Logistic regression was used to evaluate the effects of antenatal care visits and birth preparedness activities on facility delivery using complex sample analysis.

**Outcome measures:** facility delivery

**Results:** Overall facility delivery rate was low at 36.9% (95% CI 33.5% to 40.2%, SE 1.69). Only half (50.1%) of the women made four or more antenatal care visits while 62.9% (95% CI 59.9% to 65.8%, SE 1.51) did not indicate any of the four birth preparation activities. After adjusting for external, predisposing and enabling factors, women who made more than four antenatal care visits were five times more likely to deliver at a health facility when compared to those who paid no visit (adjusted OR 4.94, 95% CI 3.14 to 7.76). Similarly, the likelihood for facility delivery increased by 3.4 fold among women who prepared for at least two of the four activities compared to their counterparts who made no preparation (adjusted OR 3.41, 95% CI 2.01 to 5.58).

**Conclusion:** The perceived need, as expressed by the frequency of antenatal care visits and birth preparedness activities, plays an important role in institutional delivery service utilisation for Nepalese women. These findings have implications for behavioural interventions such as birth preparedness and complication readiness, which aims to change women's intention to deliver at a health facility.

## Article Summary

### Strength and limitations

- This study used the nationally representative large sample of married women from 2011 NDHS survey with a high response rate.
- A major limitation of this study is that information was not available on some known determinants of facility delivery utilisation, particularly quality of providers and distance and transportation to facility.
- Perceived need of facility delivery was assessed by antenatal visits and birth preparedness activities, which were positively associated with facility delivery utilisation.

## INTRODUCTION

Globally, nearly all (99%) maternal deaths occur in low income countries, mainly caused by non-utilisation of available delivery services or delays in accessing such services.<sup>1,2</sup> Indeed, about half of all births in South Asia still occur at home.<sup>3</sup> A number of interventions have been implemented to increase the rate of facility delivery and access to emergency obstetric care, including the establishment of birth centres and maternity waiting homes, reduction of user fees, provision of incentives and birth preparedness packages.<sup>4,5</sup> The 'safer mother programme' in Nepal provides free delivery services with delivery incentives to women who deliver in a designated health facility.<sup>6</sup>

Although there is a substantial reduction of maternal mortality from 539 maternal deaths per 100000 live births in 1996 to 281 in 2006 in Nepal, there has not been proportionate increase in utilisation of institutional delivery service.<sup>7</sup> The recent demography survey in 2011 reported that still about 65% of women deliver at homes and only 36% of births occur in presence of skilled birth attendants<sup>8</sup>, whereas the national target is to achieve 60% of births by skilled birth attendants by 2015 to meet the Millennium Development Goal 5 target of 134 per 100000 live births.<sup>9</sup> Thus, utilisation of institutional delivery service is a major concern in Nepal.

According to the behavioural model proposed by Andersen, need factors are fundamental to healthcare seeking behaviour; that is, one should perceive a condition as susceptible and severe enough before seeking care to gain benefits.<sup>10</sup> For institutional delivery service utilisation, this means the pregnant woman and her family must recognise pregnancy and childbirth as abnormal events, so that life threatening situations may arise without any prediction.<sup>11</sup> In many low income countries including Nepal, pregnancy and child birth are

1  
2  
3 often perceived as normal life events without justification to seek professional help.<sup>12, 13</sup> In  
4  
5 fact, need factors can be driven by pregnancy related factors such as awareness, health  
6  
7 knowledge of pregnancy and risk, importance given to pregnancy, community customs,  
8  
9 previous facility use, parity, and pregnancy complications.<sup>14</sup> Those women who perceive the  
10  
11 need of professional help and recognise the risk of pregnancy and delivery are expected to  
12  
13 make antenatal visits and prepare and arrange for childbirth.<sup>15</sup> Besides the immediate need,  
14  
15 utilisation of institutional delivery service can be affected by predisposing and enabling  
16  
17 factors as well as external environment factors, as depicted by the conceptual framework in  
18  
19 Figure 1, which is adapted from Andersen's behavioural model for the utilisation of health  
20  
21 services.<sup>10</sup>  
22  
23  
24  
25  
26

27  
28 Despite the important role of need factors, their effect on utilisation of institutional delivery  
29  
30 service has seldom been investigated in the context of safe motherhood programs. The aim of  
31  
32 the present study is to assess the contribution of need factors with respect to the utilisation of  
33  
34 institutional delivery service in Nepal, using data from the national Nepal Demographic  
35  
36 Health Survey (NDHS). The need factors were assessed by antenatal care visits and birth  
37  
38 preparedness activities as available in NDHS 2011 data.  
39  
40  
41  
42  
43  
44

## 45 **METHODS**

### 46 **Study setting**

47  
48 Nepal, with a population of 27.5 million, is divided into five developmental regions, each  
49  
50 extending from north to south. The country has also three ecological zones across east to  
51  
52 west: Terai, Hill and Mountain. These 15 sub-ecological regions are further divided into  
53  
54 smaller districts. Typically, each district has Village Development Committees (VDC) in  
55  
56  
57  
58  
59  
60



1  
2  
3 rural areas and municipalities in urban areas. Each VDC or municipality in turn consists of  
4  
5 small administrative units known as wards.  
6  
7

### 8 9 **Data and sampling**

10  
11 The data for this study were obtained from the 2011 NDHS conducted by the Ministry of  
12  
13 Health and Population. The 2011 NDHS survey was approved by Nepal Health Research  
14  
15 Council and data were accessible from MEASURE DHS project on request.<sup>16</sup> Permission to  
16  
17 use the data was obtained by the authors. Details of the sampling methodology had been  
18  
19 described elsewhere.<sup>8</sup> Briefly, the survey utilised a two-stage cluster sampling method with  
20  
21 wards (enumeration areas) being the primary sampling units. The wards were stratified by  
22  
23 sub-ecological domains and by rural-urban residency. In total, 11,085 households were  
24  
25 selected as listing units from these 289 wards. Among them, 12,961 women aged 15-49 years  
26  
27 were identified as eligible but individual interviews were only completed for 12,699 women,  
28  
29 giving a response rate of 98%. This study focused on the subset of 4079 ever married women  
30  
31 who had given birth within the past five years preceding the survey and who provided  
32  
33 information on antenatal visits and preparation activities.  
34  
35  
36  
37  
38  
39

### 40 41 **Statistical analysis**

42  
43 The outcome variable was 'place of delivery': home versus facility (private or public). This  
44  
45 binary variable was chosen instead of 'assisted deliveries' to emphasize the use of  
46  
47 institutional delivery services and to avoid potential problem of inaccurate reporting of birth  
48  
49 attendant skills. Perceived need factors investigated were (1) frequency of antenatal care  
50  
51 visits and (2) birth preparedness. The latter referred to four preparation activities, namely,  
52  
53 planning for a birth attendant, saving money, arrangement for transportation, and  
54  
55 identification of potential blood donator.<sup>17</sup> Although the 2011 NDHS collected information  
56  
57  
58  
59  
60

on planning activities related to preparation of clothes, delivery kit and food, these activities did not necessarily imply the need for facility delivery; consequently, they were not considered as need factors of institutional delivery service use.

Table 1 gives the classification of variables used in this study. These variables were chosen in view of the conceptual framework of factors associated with utilisation of institutional delivery services (Figure 1). NDHS applied principal component analysis of a range of household assets to generate wealth quintiles. Ethnicity was categorised by three groups: upper caste (Hill Brahmin, Hill Cheetri, Terai Brahmin, Terai Cheetri), lower caste (Hill Dalit, Terai Dalit) and other (all other recorded ethnicities). Education was classified as none, primary (1-5 grade), secondary (6-10 grade), and higher (after 10<sup>th</sup> grade).

In the 2011 NDHS, enumeration areas were not allocated proportional to their population size, thus requiring adjustment by sampling weights prior to analysis. Such sampling weights were provided by the survey to account for cluster level variables and strata (domain) level variables. Based on these sampling weights, a complex sampling plan file was then prepared to perform logistic regression modelling, with need factors and other confounding factors listed in Table 1. All statistical analyses were conducted in the SPSS package version 21.

Table 1: Classification of variables used in the analysis (n=4079)

| Variables                | categories | Weighted percentage | Unweighted count |
|--------------------------|------------|---------------------|------------------|
| <b>Place of delivery</b> | Home       | 63.1                | 2397             |

|                                       |           |      |      |
|---------------------------------------|-----------|------|------|
|                                       | Facility  | 36.9 | 1682 |
| <b>Antenatal care visits</b>          | 0         | 15.2 | 611  |
|                                       | 1         | 6.1  | 234  |
|                                       | 2         | 12.2 | 426  |
|                                       | 3         | 16.4 | 657  |
|                                       | 4         | 19.7 | 901  |
|                                       | ≥ 5       | 30.4 | 1250 |
| <b>Birth preparedness<sup>#</sup></b> | 0         | 62.9 | 2476 |
|                                       | 1         | 33.3 | 1440 |
|                                       | ≥ 2       | 3.8  | 163  |
| <b>Women's age (years)</b>            | 15-19     | 7.1  | 306  |
|                                       | 20-24     | 33.4 | 1273 |
|                                       | 25-29     | 32.2 | 1335 |
|                                       | 30-49     | 27.3 | 1165 |
| <b>Women's education</b>              | None      | 47.3 | 1765 |
|                                       | Primary   | 20.0 | 817  |
|                                       | Secondary | 27.2 | 1225 |
|                                       | Higher    | 5.5  | 272  |
| <b>Partner Education</b>              | None      | 23.2 | 745  |
|                                       | Primary   | 24.5 | 989  |
|                                       | Secondary | 42.1 | 1815 |
|                                       | Higher    | 10.2 | 514  |
| <b>Parity</b>                         | 1         | 24.2 | 1248 |
|                                       | 2         | 30.6 | 1157 |
|                                       | 3         | 19.3 | 690  |

|                             |             |      |      |
|-----------------------------|-------------|------|------|
|                             | 4           | 10.8 | 440  |
|                             | ≥ 5         | 15.1 | 544  |
| <b>Wealth quintiles</b>     | 1           | 25.8 | 1160 |
|                             | 2           | 21.9 | 832  |
|                             | 3           | 21.0 | 739  |
|                             | 4           | 17.4 | 677  |
|                             | 5           | 13.9 | 671  |
| <b>Ethnicity</b>            | Other       | 52.1 | 1813 |
|                             | Lower caste | 17.8 | 703  |
|                             | Upper caste | 30.1 | 1552 |
| <b>Region</b>               | Mountain    | 7.9  | 742  |
|                             | Hill        | 39.5 | 1656 |
|                             | Terai       | 52.6 | 1681 |
| <b>Residential location</b> | Rural       | 90.7 | 3182 |
|                             | Urban       | 9.3  | 897  |

<sup>#</sup>Birth preparedness consists of four preparation activities (planning for a birth attendant, saving money, arrangement for transportation, and identification of potential blood donator)

## RESULTS

Table 1 shows the characteristics of the 4079 eligible women. About half of the participants had no education (47.3%) and came from the Terai region (52.6%). Almost two-third of them were between 20-29 years of age. Although half (50.1%) of the women made four or more antenatal care visits, 15.2% of eligible women never visited a health facility before giving birth. The majority of mothers (62.9% with CI 59.9% to 65.8% and SE 1.51 ) did not

1  
2  
3 indicate any of the four birth preparation activities, while no women prepared for all four  
4  
5 activities.  
6  
7  
8

9  
10 The overall facility delivery rate was found to be 36.9% (CI 33.5% to 40.2%, SE 1.69). Table  
11  
12 2 presents the results of logistic regression analysis. Both need factors were positively  
13  
14 associated with the facility delivery status. Even after adjusting the effects of predisposing,  
15  
16 enabling, and external environment factors, the two need factors remained statistically  
17  
18 significant ( $p < 0.001$ ). The confounders were adjusted simultaneously and included women's  
19  
20 age, women's education, partner education, parity, wealth quintiles, ethnicity, region and  
21  
22 residential location as presented in Table 1 and as available from the NDHS 2011 data set. In  
23  
24 particular, women who made five or more antenatal care visits were almost five times more  
25  
26 likely to deliver at a health facility when compared to those who paid no visit prior to  
27  
28 delivery (adjusted odds ratio (OR) 4.94, 95% confidence interval (CI) 3.14 to 7.76) .  
29  
30 Similarly, the likelihood for facility delivery increased by 3.4 fold among women who  
31  
32 prepared for at least two of the four activities, relative to their counterparts who chose to  
33  
34 make no preparation (adjusted OR 3.41, 95% CI 2.01 to 5.58).  
35  
36  
37  
38  
39  
40  
41  
42  
43  
44  
45  
46  
47  
48  
49  
50  
51  
52  
53  
54  
55  
56  
57  
58  
59  
60

Table 2 Crude and adjusted odds ratio of facility delivery, NDHS 2011 (n=4079)

|                              | Crude OR (95% CI)    | Adjusted OR <sup>a</sup> (95% CI) | p       |
|------------------------------|----------------------|-----------------------------------|---------|
| <b>Antenatal care visits</b> |                      |                                   |         |
| 0                            | 1                    | 1                                 | < 0.001 |
| 1                            | 1.79 (1.03, 3.10)    | 1.30 (0.72, 2.34)                 |         |
| 2                            | 2.58 (1.62, 4.10)    | 1.75 (1.07, 2.93)                 |         |
| 3                            | 4.18 (2.69, 6.50)    | 2.21 (1.39, 3.43)                 |         |
| 4                            | 8.71 (5.40, 14.05)   | 4.13 (2.51, 6.44)                 |         |
| ≥ 5                          | 17.89 (11.23, 28.51) | 4.94 (3.14, 7.76)                 |         |
| <b>Birth preparedness</b>    |                      |                                   |         |
| 0                            | 1                    | 1                                 | < 0.001 |
| 1                            | 2.68 (2.18, 3.30)    | 1.52 (1.19, 1.88)                 |         |
| ≥ 2                          | 9.31 (5.71, 15.17)   | 3.41 (2.01, 5.58)                 |         |

<sup>a</sup> Adjusted for variables age, education, partner education, parity, wealth quintiles, ethnicity, region and residential location as shown in Table 1.

## DISCUSSION

The national survey data revealed the majority of Nepalese mothers did not prepare any of the four activities and only half of the women made the recommended 4 or more antenatal

1  
2  
3 care visits, which suggested that they might have no intention or might not perceive the need  
4  
5 of giving birth at a health facility. Such perception of need can also be influenced by distance  
6  
7 and quality of maternity services. Indeed, the facility delivery rate was found to be only  
8  
9 36.9%. In the traditional Nepalese society, childbirth continues to take place at home, while  
10  
11 many women still hold the view that facility delivery is unnecessary. On the other hand, those  
12  
13 women who were prepared and made antenatal visits tended to give birth at facilities. Our  
14  
15 results confirmed the strong contribution by these need factors to actual facility utilisation  
16  
17 irrespective of predisposing, enabling, and external environment factors.  
18  
19

20  
21  
22 Although the frequency of antenatal care visits was associated with subsequent facility  
23  
24 delivery, the relationship appeared to be dose-dependent,<sup>14, 18</sup> as in the case of the present  
25  
26 study whereby making a single visit induced no significant impact; whereas previous studies  
27  
28 undertaken in Tanzania observed high use of antenatal care but low use of facility delivery.<sup>19,</sup>  
29  
30 <sup>20</sup> Making the recommended four or more antenatal care visits might reflect the woman's  
31  
32 concern of her pregnancy, pregnancy complications and the need for professional help.<sup>14,</sup>  
33  
34 <sup>21</sup> Consequently, informing women about danger signs and providing qualitative antenatal  
35  
36 care with provision of iron tablets and blood check might encourage women to go for  
37  
38 antenatal visits.  
39  
40  
41  
42  
43  
44

45  
46 The link between birth preparedness activities and facility delivery was supported by recent  
47  
48 literature. A prospective cohort study of 701 pregnant women in the Kaski district of Nepal  
49  
50 found preparation activities could increase the facility delivery rate.<sup>18</sup> Similarly, a  
51  
52 randomised trial in Tanzania demonstrated that skilled delivery care uptake was 16.8% higher  
53  
54 among women who had been counselled on promotion of birth plan than others without such  
55  
56 counselling.<sup>22</sup> Raising awareness and help for birth plan also led to increased facility  
57  
58  
59  
60

1  
2  
3 utilisation in other intervention studies conducted in Burkina Faso, Bangladesh and Eritrea.  
4  
5 <sup>23-25</sup>. However, two previous pre-post evaluation studies of birth preparedness in southern  
6  
7 districts of Nepal reported that increased preparedness level was not significantly translated  
8  
9 into increased facility delivery.<sup>26, 27</sup>  
10

11  
12  
13  
14 The findings have important implications for safe motherhood program in Nepal and other  
15  
16 low income countries. Because the intention to deliver at a health facility can be largely  
17  
18 influenced by need factors, women should be extensively counselled and convinced of the  
19  
20 benefits and safety of facility delivery. Any behavioural intervention such as birth  
21  
22 preparedness package and complication readiness is unlikely to be successful unless attaining  
23  
24 a high level capable to change the women's attitude and intention. Counselling can be  
25  
26 performed by health worker, preferably female health workers, at a health facility or by  
27  
28 female community health volunteers at household visits. Further, local teachers and social  
29  
30 workers can also be involved in awareness raising campaign. Community networks and  
31  
32 mother clubs can also support in preparation activities such as money and transport  
33  
34 management.  
35  
36  
37  
38  
39

40  
41 The strength of the present study was the use of a nationally representative large sample of  
42  
43 married women with a high response rate. However, information was lacking on some known  
44  
45 determinants of facility delivery utilisation, particularly quality of providers and distance and  
46  
47 transportation to facility. These variables were unavailable from the 2011 NDHS database  
48  
49 and posed as the major limitation. Nevertheless, the external factors 'residential location' and  
50  
51 'region' have provided some proxy information to partially compensate the effect of distance  
52  
53 and service availability. Institutional delivery services in Terai and urban areas are more  
54  
55 physically accessible than in hilly or mountainous parts of the country. The regression model  
56  
57  
58  
59  
60



1  
2  
3 used 'region' and 'residence' as confounders together with other known predisposing and  
4  
5 enabling factors that include women's age, education, partner education, parity, wealth  
6  
7 quintiles and ethnicity.  
8  
9

## 10 11 12 **CONCLUSION**

13  
14 Utilisation of institutional delivery services remained low in Nepal. The majority of mothers  
15  
16 were not prepared for childbirth and only half the women made the recommended four or  
17  
18 more antenatal care visits, indicating their perceived lack of need for facility delivery. The  
19  
20 national data confirmed the strong associations between such need factors and institutional  
21  
22 delivery service utilisation. This strong association has implications for behavioural  
23  
24 interventions such as birth preparedness and complication readiness, which aims to change  
25  
26 women's intention to deliver at a health facility.  
27  
28  
29  
30  
31  
32  
33  
34  
35  
36  
37  
38  
39  
40  
41  
42  
43  
44  
45  
46  
47  
48  
49  
50  
51  
52  
53  
54  
55  
56  
57  
58  
59  
60

### **Acknowledgements**

The authors are grateful to the ICF International, Calverton, Maryland, USA, for providing the data for this study.

### **Contributors**

RK conceived the study design, did data analysis and drafted the paper. AHD assisted in data analysis and revision of the paper. VK assisted in data archive and provided comments. All the three authors read and approved the final version.

### **Competing Interests**

None declared for all authors.

### **Data sharing statement**

Data of 2011 Nepal Demographic and Health Survey can be obtained from MEASURE DHS ICF International, Calverton, Maryland, USA.

## REFERENCES

1. World Health Organization. *Trends in maternal mortality 1990 to 2010*. WHO, UNICEF, UNFPA and World Bank. WHO, Geneva, Switzerland,2012.
2. Ronsmans C, Graham WJ. Maternal mortality: who, when, where, and why. *The Lancet* 2006;368(9542):1189-200.
3. United Nations. *The Millenium Development goals Report 2013*. New York: United Nations,2013.
4. Metcalfe R, Adegoke AA. Strategies to increase facility-based skilled birth attendance in South Asia: a literature review. *International Health* 2013;5(2):96-105.
5. De Brouwere V, Richard F, Witter S. Access to maternal and perinatal health services: lessons from successful and less successful examples of improving access to safe delivery and care of the newborn. *Tropical Medicine and International Health* 2010;15(8):901-9.
6. Karkee R, Binns C, Lee A. Determinants of facility delivery after implementation of safer mother programme in Nepal: a prospective cohort study. *BMC Pregnancy and Childbirth* 2013;13(1):193.
7. Karkee R. How did Nepal reduce the maternal mortality? A result from analysing the determinants of maternal mortality. *Journal of Nepal Medical Association* 2012;52(186):88-94.
8. MoHP [Nepal], New ERA, ICF International Inc. *Nepal Demographic and Health Survey 2011*. Kathmandu, Nepal and Calverton, Maryland: Ministry of Health and Population [Nepal ], New ERA, and ICF International Inc.,2012.
9. National Planning Commission/UN Country Team of Nepal. *Nepal Millennium Development Goals Progress Report 2010*. Kathmandu: National Planning Commission, Government of Nepal/UN Country Team of Nepal,2010.
10. Andersen RM. Revisiting the Behavioral Model and Access to Medical Care: Does it Matter? *Journal of Health and Social Behavior* 1995;36(1):1-10.

- 1  
2  
3 11. Thaddeus S, Maine D. Too far to walk: Maternal mortality in context. *Social Science and*  
4  
5 *Medicine* 1994;38(8):1091-110.  
6
- 7 12. Pradhan A, Suvedi BK, Barnett S, et al. *Nepal Maternal Mortality and Morbidity Study*  
8  
9 *2008/2009*. Ministry of Health and Population, Government of Nepal, Kathmandu  
10  
11  
12 2010.
- 13  
14 13. Agus Y, Shigeko H, Porter SE. Rural Indonesia women's traditional beliefs about antenatal  
15  
16 care. *BMC Research Notes* 2012;589.
- 17  
18 14. Gabrysch S, Campbell OMR. Still too far to walk: Literature review of the determinants of  
19  
20 delivery service use. *BMC Pregnancy and Childbirth* 2009;9:34.
- 21  
22 15. JHPIEGO. *Behaviour change intervention for safe motherhood: common problems, unique*  
23  
24 *solutions*. Baltimore: 2004.
- 25  
26 16. MEASURE DHS/ ICF International.  
27  
28 [http://www.measuredhs.com/data/dataset/Nepal\\_Standard-DHS\\_2011.cfm?flag=0](http://www.measuredhs.com/data/dataset/Nepal_Standard-DHS_2011.cfm?flag=0) (accessed  
29  
30 15 Jan 2014),  
31
- 32 17. JHPIEGO. *Monitoring birth preparedness and complication readiness, tools and indicators*  
33  
34 *for maternal and newborn health*. Baltimore: 2004.
- 35  
36 18. Karkee R, Lee A, Binns C. Birth preparedness and skilled attendance at birth in Nepal:  
37  
38 Implications for achieving Millennium Development Goal 5. *Midwifery* 2013;29(10):1206-  
39  
40 10.  
41
- 42 19. Mpembeni RNM, Killewo JZ, Leshabari MT, et al. Use pattern of maternal health services  
43  
44 and determinants of skilled care during delivery in Southern Tanzania: Implications for  
45  
46 achievement of MDG-5 targets. *BMC Pregnancy and Childbirth* 2007;7.  
47
- 48 20. Magoma M, Requejo J, Campbell O, et al. High ANC coverage and low skilled attendance in  
49  
50 a rural Tanzanian district: a case for implementing a birth plan intervention. *BMC Pregnancy*  
51  
52 *and Childbirth* 2010;10(1):13.  
53  
54  
55  
56  
57  
58  
59  
60

- 1  
2  
3 21. Titaley C, Dibley M, Roberts C. Factors associated with underutilization of antenatal care  
4 services in Indonesia: results of Indonesia Demographic and Health Survey 2002/2003 and  
5 2007. *BMC Public Health* 2010;10(1):485.  
6  
7  
8  
9 22. Magoma M, Requejo J, Campbell O, et al. The effectiveness of birth plans in increasing use  
10 of skilled care at delivery and postnatal care in rural Tanzania: a cluster randomised trial.  
11 *Tropical Medicine and International Health* 2013;18(4):435-43.  
12  
13  
14 23. Brazier E, Andrzejewski C, Perkins ME, et al. Improving poor women's access to maternity  
15 care: Findings from a primary care intervention in Burkina Faso. *Social Science and Medicine*  
16 2009;69(5):682-90.  
17  
18  
19 24. Hossain J, Ross SR. The effect of addressing demand for as well as supply of emergency  
20 obstetric care in Dinajpur, Bangladesh. *International Journal of Gynecology & Obstetrics*  
21 2006;92(3):320-28.  
22  
23  
24 25. Turan JM, Tesfagiorghis M, Polan ML. Evaluation of a Community Intervention for  
25 Promotion of Safe Motherhood in Eritrea. *The Journal of Midwifery & Women's Health*  
26 2011;56(1):8-17.  
27  
28  
29 26. McPherson R, Khadka N, Moore J, et al. Are birth-preparedness programmes effective?  
30 Results from a field trial in Siraha district, Nepal. *J Health Popul Nutr* 2006;24479-88.  
31  
32  
33 27. Hodgins S, McPherson R, Suvedi BK, et al. Testing a scalable community-based approach to  
34 improve maternal and neonatal health in rural Nepal. *Journal of Perinatology*  
35 2010;30(6):388-95.  
36  
37  
38  
39  
40  
41  
42  
43  
44  
45  
46  
47  
48  
49  
50  
51  
52  
53  
54  
55  
56  
57  
58  
59  
60

## Need factors for utilisation of delivery services in Nepal

Rajendra Karkee\*, Andy H. Lee, Vishnu Khanal

Rajendra Karkee\*

School of Public Health and Community Medicine, BP Koirala Institute of Health Sciences,

Dharan, Nepal

E-mail: rkarkee@gmail.com

Andy H. Lee

School of Public Health, Curtin University, Perth, WA, Australia

E-mail: Andy.Lee@curtin.edu.au

Vishnu Khanal

Sanjeevani College of Medical Sciences, Butwal, Rupandehi, Nepal

E-mail: khanal.vishnu@gmail.com

### \* Corresponding author

School of Public Health and Community Medicine, BP Koirala Institute of Health Sciences,

Dharan, Nepal

Phone: +977 98420 64635

E-mail: rkarkee@gmail.com

**Keywords:** birth preparedness, facility delivery, maternity service, need factors, Nepal

**Word count:** 2149

**ABSTRACT**

**Objectives:** This study aims to assess the role of need factors with respect to the utilisation of delivery services in Nepal.

**Design:** An analytic study was conducted using a subset of 4079 ever married women from the 2011 Nepal Demographic and Health Survey, which utilised two-stage cluster sampling.

**Outcome measures:** perceived need assessed by frequency of antenatal care visits and birth preparedness activities

**Results:** Overall facility delivery rate was low at 36.9%. Only half (50.1%) of the women made four or more antenatal care visits while 62.9% did not indicate any of the four birth preparation activities. Women who made more than four antenatal care visits were five times more likely to deliver at a health facility when compared to those who paid no visit (adjusted OR 4.94, 95% CI 3.14 to 7.76). Similarly, the likelihood for facility delivery increased by 3.4 fold among women who prepared for at least two of the four activities compared to their counterparts who made no preparation (adjusted OR 3.41, 95% CI 2.01 to 5.58).

**Conclusion:** The perceived need, as expressed by the frequency of antenatal care visits and birth preparedness activities, plays an important role in delivery service utilisation for Nepalese women. For behavioural interventions to be effective in safe motherhood programs, they must be capable of convincing the women to give birth at a health facility.

## Article Summary

### Strength and limitations

- This study used the nationally representative large sample of married women from 2011 NDHS survey with a high response rate.
- A major limitation of this study is that information was not available on some known determinants of facility delivery utilisation, particularly quality of providers and distance and transportation to facility.
- Perceived need of facility delivery was assessed by antenatal visits and birth preparedness activities, which were positively associated with facility delivery utilisation.



## INTRODUCTION

Globally, nearly all (99%) maternal deaths occur in developing countries, mainly caused by non-utilisation of available delivery services or delays in accessing such services.<sup>1,2</sup> A number of interventions have been implemented to increase the rate of facility delivery and access to emergency obstetric care, including the establishment of birth centres and maternity waiting homes, reduction of user fees, provision of incentives and birth preparedness packages.<sup>3,4</sup> However, about half of all births in South Asia still occur at home.<sup>5</sup> In particular, 65% of births take place at home in Nepal.<sup>6</sup>

According to the behavioural model proposed by Andersen, need factors are fundamental to healthcare seeking behaviour; that is, one should perceive a condition as susceptible and severe enough before seeking care to gain benefits.<sup>7</sup> For delivery service utilisation, this means the pregnant woman and her family must recognise pregnancy and childbirth as abnormal events, so that life threatening situations may arise without any prediction.<sup>8</sup> In many developing countries including Nepal, pregnancy and child birth are often perceived as normal life events without justification to seek professional help.<sup>9,10</sup> In fact, need factors can be driven by pregnancy related factors such as awareness, health knowledge of pregnancy and risk, importance given to pregnancy, community customs, previous facility use, parity, and pregnancy complications.<sup>11</sup> Those women who perceive the need of professional help and recognise the risk of pregnancy and delivery are expected to make antenatal visits and prepare and arrange for childbirth. Besides the immediate need, utilisation of delivery service can be affected by predisposing and enabling factors as well as external environment factors, as depicted by the conceptual framework in Figure 1, which is adapted from Andersen's behavioural model for the utilisation of health services.<sup>7</sup>

1  
2  
3 Despite the important role of need factors, their effect on utilisation of delivery service has  
4  
5 seldom been investigated in the context of safe motherhood programs. The aim of the present  
6  
7 study is to assess the contribution of need factors with respect to the utilisation of delivery  
8  
9 service in Nepal, using data from the national Nepal Demographic Health Survey (NDHS).  
10  
11

## 12 13 **METHODS**

### 14 **Study setting**

15  
16 Nepal, with a population of 27.5 million, is divided into five developmental regions, each  
17  
18 extending from north to south. The country has also three ecological zones across east to  
19  
20 west: Terai, Hill and Mountain. These 15 sub-ecological regions are further divided into  
21  
22 smaller districts. Typically, each district has Village Development Committees (VDC) in  
23  
24 rural areas and municipalities in urban areas. Each VDC or municipality in turn consists of  
25  
26 small administrative units known as wards.  
27  
28  
29  
30  
31

### 32 **Data and sampling**

33  
34 The data for this study were obtained from the 2011 NDHS conducted by the Ministry of  
35  
36 Health and Population. The 2011 NDHS survey was approved by Nepal Health Research  
37  
38 Council and data were accessible from MEASURE DHS project on request. Permission to  
39  
40 use the data was obtained by the authors. Details of the sampling methodology had been  
41  
42 described elsewhere.<sup>6</sup> Briefly, the survey utilised a two-stage cluster sampling method with  
43  
44 wards (enumeration areas) being the primary sampling units. The wards were stratified by  
45  
46 sub-ecological domains and by rural-urban residency. In total, 11,085 households were  
47  
48 selected as listing units from these 289 wards. Among them, 12,961 women aged 15-49 years  
49  
50 were identified as eligible but individual interviews were only completed for 12,699 women,  
51  
52  
53  
54  
55  
56  
57  
58  
59  
60

1  
2  
3 giving a response rate of 98%. This study focused on the subset of 4079 ever married women  
4  
5 who had given birth within the past five years preceding the survey.  
6  
7

### 8 9 **Statistical analysis**

10 The outcome variable was 'place of delivery': home versus facility (private or public). This  
11  
12 binary variable was chosen instead of 'assisted deliveries' to emphasize the use of delivery  
13  
14 services and to avoid potential problem of inaccurate reporting of birth attendant skills.  
15  
16 Perceived need factors investigated were (1) frequency of antenatal care visits and (2) birth  
17  
18 preparedness. The latter referred to four preparation activities, namely, planning for a birth  
19  
20 attendant, saving money, arrangement for transportation, and identification of potential blood  
21  
22 donator. Although the 2011 NDHS collected information on planning activities related to  
23  
24 preparation of clothes, delivery kit and food, these activities did not necessarily imply the  
25  
26 need for facility delivery; consequently, they were not considered as need factors.  
27  
28  
29  
30  
31

32  
33 Table 1 gives the classification of variables used in this study. These variables were chosen in  
34  
35 view of the conceptual framework of factors associated with utilisation of delivery services  
36  
37 (Figure 1). NDHS applied principal component analysis of a range of household assets to  
38  
39 generate wealth quintiles. Ethnicity was categorised by three groups: upper caste (Hill  
40  
41 Brahmin, Hill Cheetri, Terai Brahmin, Terai Cheetri), lower caste (Hill Dalit, Terai Dalit) and  
42  
43 other (all other recorded ethnicities). Education was classified as none, primary (1-5 grade),  
44  
45 secondary (6-10 grade), and higher (after 10<sup>th</sup> grade).  
46  
47  
48  
49

50  
51 In the 2011 NDHS, enumeration areas were not allocated proportional to their population  
52  
53 size, thus requiring adjustment by sampling weights prior to analysis. Such sampling weights  
54  
55 were provided by the survey to account for cluster level variables and strata (domain) level  
56  
57  
58  
59  
60

variables. Based on these sampling weights, a complex sampling plan file was then prepared to perform logistic regression modelling, with need factors and other confounding factors listed in Table 1. All statistical analyses were conducted in the SPSS package version 21.

Table 1: Classification of variables used in the analysis (n=4079)

| Variables                    | categories | Weighted percentage |
|------------------------------|------------|---------------------|
| <b>Place of delivery</b>     | Home       | 63.1                |
|                              | Facility   | 36.9                |
| <b>Antenatal care visits</b> | 0          | 15.2                |
|                              | 1          | 6.1                 |
|                              | 2          | 12.2                |
|                              | 3          | 16.4                |
|                              | 4          | 19.7                |
|                              | ≥ 5        | 30.4                |
| <b>Birth preparedness</b>    | 0          | 62.9                |
|                              | 1          | 33.3                |
|                              | ≥ 2        | 3.8                 |
| <b>Age (years)</b>           | 15-19      | 7.1                 |
|                              | 20-24      | 33.4                |
|                              | 25-29      | 32.2                |
|                              | 30-49      | 27.3                |
| <b>Education</b>             | None       | 47.3                |
|                              | Primary    | 20.0                |
|                              | Secondary  | 27.2                |

1  
2  
3  
4  
5  
6  
7  
8  
9  
10  
11  
12  
13  
14  
15  
16  
17  
18  
19  
20  
21  
22  
23  
24  
25  
26  
27  
28  
29  
30  
31  
32  
33  
34  
35  
36  
37  
38  
39  
40  
41  
42  
43  
44  
45  
46  
47  
48  
49  
50  
51  
52  
53  
54  
55  
56  
57  
58  
59  
60

|                             |             |      |
|-----------------------------|-------------|------|
|                             | Higher      | 5.5  |
| <b>Partner Education</b>    | None        | 23.2 |
|                             | Primary     | 24.5 |
|                             | Secondary   | 42.1 |
|                             | Higher      | 10.2 |
| <b>Parity</b>               | 1           | 24.2 |
|                             | 2           | 30.6 |
|                             | 3           | 19.3 |
|                             | 4           | 10.8 |
|                             | ≥ 5         | 15.1 |
| <b>Wealth quintiles</b>     | 1           | 25.8 |
|                             | 2           | 21.9 |
|                             | 3           | 21.0 |
|                             | 4           | 17.4 |
|                             | 5           | 13.9 |
| <b>Ethnicity</b>            | Other       | 52.1 |
|                             | Lower caste | 17.8 |
|                             | Upper caste | 30.1 |
| <b>Region</b>               | Mountain    | 7.9  |
|                             | Hill        | 39.5 |
|                             | Terai       | 52.6 |
| <b>Residential location</b> | Rural       | 90.7 |
|                             | Urban       | 9.3  |

---

## RESULTS

Table 1 shows the characteristics of the 4079 eligible women. About half of the participants had no education (47.3%) and came from the Terai region (52.6%). Almost two-third of them were between 20-29 years of age. Although half (50.1%) of the women made four or more antenatal care visits, 15.2% of women never visited a health facility before giving birth. The majority of mothers (62.9%) did not indicate any of the four birth preparation activities, while no women prepared for all four activities.

The overall facility delivery rate was found to be 36.9%. Table 2 presents the results of logistic regression analysis. Both need factors were positively associated with the facility delivery status. Even after adjusting the effects of predisposing, enabling, and external environment factors, the two need factors remained statistically significant ( $p < 0.001$ ). In particular, women who made five or more antenatal care visits were almost five times more likely to deliver at a health facility when compared to those who paid no visit prior to delivery (adjusted odds ratio (OR) 4.94, 95% confidence interval (CI) 3.14 to 7.76). Similarly, the likelihood for facility delivery increased by 3.4 fold among women who prepared for at least two of the four activities, relative to their counterparts who chose to make no preparation (adjusted OR 3.41, 95% CI 2.01 to 5.58).

Table 2 Crude and adjusted odds ratio of facility delivery, NDHS 2011 (n=4079)

|                              | Crude OR (95% CI)    | Adjusted OR <sup>#</sup> (95% CI) | p       |
|------------------------------|----------------------|-----------------------------------|---------|
| <b>Antenatal care visits</b> |                      |                                   |         |
| 0                            | 1                    | 1                                 | < 0.001 |
| 1                            | 1.79 (1.03, 3.10)    | 1.30 (0.72, 2.34)                 |         |
| 2                            | 2.58 (1.62, 4.10)    | 1.75 (1.07, 2.93)                 |         |
| 3                            | 4.18 (2.69, 6.50)    | 2.21 (1.39, 3.43)                 |         |
| 4                            | 8.71 (5.40, 14.05)   | 4.13 (2.51, 6.44)                 |         |
| ≥ 5                          | 17.89 (11.23, 28.51) | 4.94 (3.14, 7.76)                 |         |
| <b>Birth preparedness</b>    |                      |                                   |         |
| 0                            | 1                    | 1                                 | < 0.001 |
| 1                            | 2.68 (2.18, 3.30)    | 1.52 (1.19, 1.88)                 |         |
| ≥ 2                          | 9.31 (5.71, 15.17)   | 3.41 (2.01, 5.58)                 |         |

<sup>#</sup> adjusted for age, education, partner education, parity, wealth quintiles, ethnicity, region and residential location.

## DISCUSSION

The national survey data revealed the majority of Nepalese mothers did not prepare any of the four activities and only half of the women made the recommended 4 or more antenatal care visits, which suggested that they had no intention or did not perceive the need of giving birth at a health facility. Indeed, the facility delivery rate was found to be only 36.9%. In the traditional Nepalese society, childbirth continues to take place at home, while many women still hold the view that facility delivery is unnecessary. On the other hand, those women who were prepared and made antenatal visits tended to give birth at facilities. Our results confirmed the strong contribution by these need factors to actual facility utilisation irrespective of predisposing, enabling, and external environment factors.

Although the frequency of antenatal care visits was associated with subsequent facility delivery, the relationship appeared to be dose-dependent,<sup>11, 12</sup> as in the case of the present study whereby making a single visit induced no significant impact; whereas previous studies undertaken in Tanzania observed high use of antenatal care but low use of facility delivery.<sup>13, 14</sup> Making the recommended four or more antenatal care visits might reflect the woman's concern of her pregnancy, pregnancy complications and the need for professional help.

The link between birth preparedness activities and facility delivery was supported by recent literature. A prospective cohort study of 701 pregnant women in the Kaski district of Nepal found preparation activities could increase the facility delivery rate.<sup>12</sup> Similarly, a randomised trial in Tanzania demonstrated that skilled delivery care uptake was 16.8% higher among women who had been counselled on promotion of birth plan than others without such counselling.<sup>15</sup> Raising awareness and help for birth plan also led to increased facility



1  
2  
3 utilisation in other intervention studies conducted in Burkina Faso, Bangladesh and Eritrea.

4  
5 16-18  
6  
7  
8

9  
10 The findings have important implications for safe motherhood program in Nepal and other  
11 developing countries. Because the intention to deliver at a health facility can be largely  
12 influenced by need factors, women should be extensively counselled and convinced of the  
13 benefits and safety of facility delivery. Any behavioural intervention such as birth  
14 preparedness package and complication readiness is unlikely to be successful unless attaining  
15 a high level capable to change the women's attitude and intention.  
16  
17  
18  
19  
20  
21  
22  
23  
24

25 The strength of the present study was the use of a nationally representative large sample of  
26 married women with a high response rate. However, information was lacking on some known  
27 determinants of facility delivery utilisation, particularly quality of providers and distance and  
28 transportation to facility. These variables were unavailable from the 2011 NDHS database  
29 and posed as the major limitation. Nevertheless, residential location and region have provided  
30 some proxy information to partially compensate the effect of distance and service  
31 availability. Delivery services in Terai and urban areas are more physically accessible than in  
32 hilly or mountainous parts of the country.  
33  
34  
35  
36  
37  
38  
39  
40  
41  
42  
43  
44

## 45 **CONCLUSION**

46  
47 Utilisation of delivery services remained low in Nepal. The majority of mothers were not  
48 prepared for childbirth and only half the women made the recommended four or more  
49 antenatal care visits, indicating their perceived lack of need for facility delivery. The national  
50 data confirmed the strong associations between such need factors and service utilisation.  
51  
52  
53  
54

55  
56 Therefore, for behavioural interventions such as birth preparedness and complication  
57  
58  
59  
60

1  
2  
3 readiness to be effective in safe motherhood programs, they must be capable of changing the  
4  
5 women's intention to deliver at a health facility.  
6  
7

### 8 9 **Acknowledgements**

10 The authors are grateful to the ICF International, Calverton, Maryland, USA, for providing  
11  
12 the data for this study.  
13  
14

### 15 16 **Contributors**

17 RK conceived the study design, did data analysis and drafted the paper. AHD assisted in data  
18  
19 analysis and revision of the paper. VK assisted in data archive and provided comments. All  
20  
21 the three authors read and approved the final version.  
22  
23  
24

### 25 26 27 **Competing Interests**

28 None declared for all authors.  
29  
30  
31  
32

### 33 34 **Data sharing statement**

35 Data of 2011 Nepal Demographic and Health Survey can be obtained from MEASURE DHS  
36  
37 ICF International, Calverton, Maryland, USA.  
38  
39  
40  
41  
42  
43  
44  
45  
46  
47  
48  
49  
50  
51  
52  
53  
54  
55  
56  
57  
58  
59  
60

## REFERENCES

1. World Health Organization. *Trends in maternal mortality 1990 to 2010*. WHO, UNICEF, UNFPA and World Bank. WHO, Geneva, Switzerland,2012.
2. Ronsmans C, Graham WJ. Maternal mortality: who, when, where, and why. *Lancet* 2006;368(9542):1189-200.
3. Metcalfe R, Adegoke AA. Strategies to increase facility-based skilled birth attendance in South Asia: a literature review. *Int Health* 2013;5(2):96-105.
4. De Brouwere V, Richard F, Witter S. Access to maternal and perinatal health services: lessons from successful and less successful examples of improving access to safe delivery and care of the newborn. *Trop Med Int Health* 2010;15(8):901-9.
5. United Nations. *The Millenium Development goals Report 2013*. New York: United Nations, 2013.
6. MoHP [Nepal], New ERA, ICF International Inc. *Nepal Demographic and Health Survey 2011*. Kathmandu, Nepal and Calverton, Maryland: Ministry of Health and Population [Nepal ], New ERA, and ICF International Inc., 2012.
7. Andersen RM. Revisiting the Behavioral Model and Access to Medical Care: Does it Matter? *J Health Soc Behav* 1995;36(1):1-10.
8. Thaddeus S, Maine D. Too far to walk: Maternal mortality in context. *Soc Sci Med* 1994;38(8):1091-110.
9. Pradhan A, Suvedi BK, Barnett S, et al. *Nepal Maternal Mortality and Morbidity Study 2008/2009*. Ministry of Health and Population, Government of Nepal, Kathmandu, 2010.
10. Agus Y, Shigeko H, Porter SE. Rural Indonesia women's traditional beliefs about antenatal care. *BMC Res Notes* 2012;5:589.

- 1  
2  
3  
4  
5  
6  
7  
8  
9  
10  
11  
12  
13  
14  
15  
16  
17  
18  
19  
20  
21  
22  
23  
24  
25  
26  
27  
28  
29  
30  
31  
32  
33  
34  
35  
36  
37  
38  
39  
40  
41  
42  
43  
44  
45  
46  
47  
48  
49  
50  
51  
52  
53  
54  
55  
56  
57  
58  
59  
60
11. Gabrysch S, Campbell OMR. Still too far to walk: Literature review of the determinants of delivery service use. *BMC Pregnancy Childbirth* 2009;9:34.
  12. Karkee R, Lee A, Binns C. Birth preparedness and skilled attendance at birth in Nepal: Implications for achieving Millennium Development Goal 5. *Midwifery* 2013;29(10):1206-10.
  13. Mpembeni RNM, Killewo JZ, Leshabari MT, et al. Use pattern of maternal health services and determinants of skilled care during delivery in Southern Tanzania: Implications for achievement of MDG-5 targets. *BMC Pregnancy Childbirth* 2007;7:29.
  14. Magoma M, Requejo J, Campbell O, Cousens S, Filippi V. High ANC coverage and low skilled attendance in a rural Tanzanian district: a case for implementing a birth plan intervention. *BMC Pregnancy Childbirth* 2010;10:13.
  15. Magoma M, Requejo J, Campbell O, Cousens S, Merialdi M, Filippi V. The effectiveness of birth plans in increasing use of skilled care at delivery and postnatal care in rural Tanzania: a cluster randomised trial. *Trop Med Int Health* 2013;18(4):435-43.
  16. Brazier E, Andrzejewski C, Perkins ME, Themmen EM, Knight RJ, Bassane B. Improving poor women's access to maternity care: Findings from a primary care intervention in Burkina Faso. *Soc Sci Med* 2009;69(5):682-90.
  17. Hossain J, Ross SR. The effect of addressing demand for as well as supply of emergency obstetric care in Dinajpur, Bangladesh. *Int J Gynecol Obstet* 2006;92(3):320-28.
  18. Turan JM, Tesfagiorgis M, Polan ML. Evaluation of a Community Intervention for Promotion of Safe Motherhood in Eritrea. *J Midwifery Womens Health* 2011;56(1):8-17.

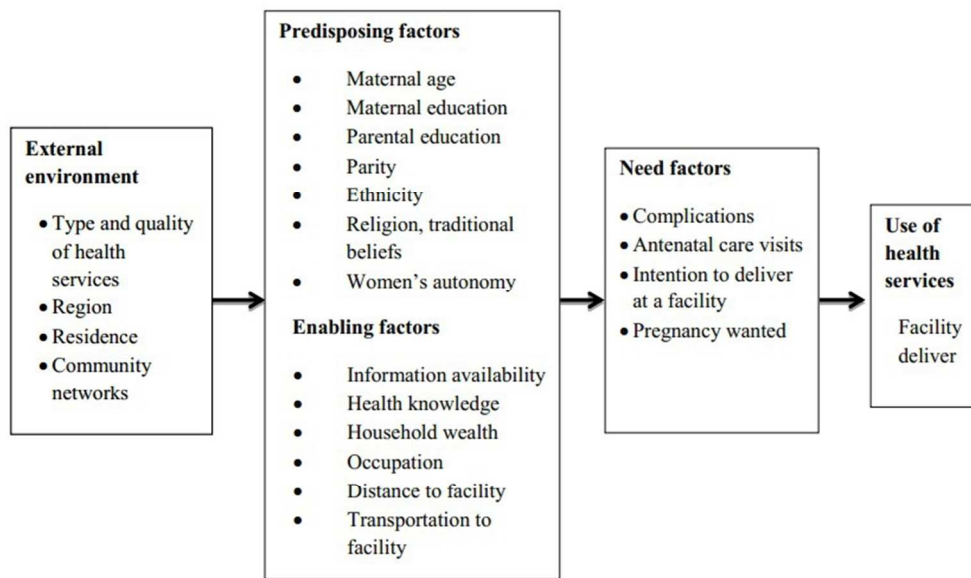

27 Conceptual framework of factors associated with the utilisation of institutional delivery services  
28 223x131mm (96 x 96 DPI)

review only



**Need factors for utilisation of institutional delivery services  
in Nepal: an analysis from Nepal Demographic and Health  
Survey, 2011**

|                                 |                                                                                                                                                                                                                               |
|---------------------------------|-------------------------------------------------------------------------------------------------------------------------------------------------------------------------------------------------------------------------------|
| Journal:                        | <i>BMJ Open</i>                                                                                                                                                                                                               |
| Manuscript ID:                  | bmjopen-2013-004372.R2                                                                                                                                                                                                        |
| Article Type:                   | Research                                                                                                                                                                                                                      |
| Date Submitted by the Author:   | 23-Feb-2014                                                                                                                                                                                                                   |
| Complete List of Authors:       | Karkee, Rajendra; BP Koirala Institute of Health Sciences, School of Public Health and Community Medicine<br>Lee, Andy; Curtin University, School of Public Health<br>Khanal, Vishnu; Sanjeevani College of Medical Sciences, |
| <b>Primary Subject Heading</b>: | Epidemiology                                                                                                                                                                                                                  |
| Secondary Subject Heading:      | Epidemiology, Public health, Health services research                                                                                                                                                                         |
| Keywords:                       | EPIDEMIOLOGY, Health policy < HEALTH SERVICES ADMINISTRATION & MANAGEMENT, International health services < HEALTH SERVICES ADMINISTRATION & MANAGEMENT                                                                        |
|                                 |                                                                                                                                                                                                                               |

SCHOLARONE™  
Manuscripts

1  
2  
3 **Need factors for utilisation of institutional delivery services in Nepal: an**  
4  
5 **analysis from Nepal Demographic and Health Survey, 2011**  
6  
7  
8  
9

10 Rajendra Karkee\*, Andy H. Lee, Vishnu Khanal  
11

12  
13  
14  
15 Rajendra Karkee\*

16  
17 School of Public Health and Community Medicine, BP Koirala Institute of Health Sciences,

18  
19 Dharan, Nepal

20  
21 E-mail: rkarkee@gmail.com  
22  
23  
24  
25

26  
27 Andy H. Lee

28  
29 School of Public Health, Curtin University, Perth, WA, Australia

30  
31 E-mail: Andy.Lee@curtin.edu.au  
32  
33  
34

35  
36 Vishnu Khanal

37  
38 Sanjeevani College of Medical Sciences, Butwal, Rupandehi, Nepal

39  
40 E-mail: khanal.vishnu@gmail.com  
41  
42  
43

44 **\* Corresponding author**

45  
46 School of Public Health and Community Medicine, BP Koirala Institute of Health Sciences,

47  
48 Dharan, Nepal

49  
50 Phone: +977 98420 64635 E-mail: rkarkee@gmail.com  
51  
52  
53  
54

55 **Keywords:** birth preparedness, facility delivery, maternity service, need factors, Nepal

56  
57 **Word count:** 2896  
58  
59  
60

## ABSTRACT

**Objectives:** This study aims to assess the role of need factors with respect to the utilisation of institutional delivery services in Nepal.

**Design:** An analytic study was conducted using a subset of 4079 ever married women from the 2011 Nepal Demographic and Health Survey, which utilised two-stage cluster sampling. Logistic regression with complex sample analysis was performed to evaluate the effects of antenatal care visits and birth preparedness activities on facility delivery.

**Outcome measures:** facility delivery

**Results:** Overall facility delivery rate was low at 36.9% (95% CI 33.5% to 40.2%, SE 1.69).

Only half (50.1%) of the women made four or more antenatal care visits while 62.9% (95% CI 59.9% to 65.8%, SE 1.51) did not indicate any of the four birth preparation activities.

After adjusting for external, predisposing and enabling factors, women who made more than four antenatal care visits were five times more likely to deliver at a health facility when compared to those who paid no visit (adjusted odds ratio 4.94, 95% CI 3.14 to 7.76).

Similarly, the likelihood for facility delivery increased by 3.4 fold among women who prepared for at least two of the four activities compared to their counterparts who made no preparation (adjusted odds ratio 3.41, 95% CI 2.01 to 5.58).

**Conclusion:** The perceived need, as expressed by the frequency of antenatal care visits and birth preparedness activities, plays an important role in institutional delivery service utilisation for Nepalese women. These findings have implications for behavioural interventions to change their intention to deliver at a health facility.



## Article Summary

### Strength and limitations

- This study used the nationally representative large sample of married women from the 2011 Nepal Demographic and Health Survey with a high response rate.
- Information was not available on some known determinants of facility delivery utilisation, particularly quality of providers, and distance and transportation to facility.
- Perceived need of facility delivery was assessed by antenatal visits and birth preparedness activities, which were positively associated with facility delivery utilisation.

## INTRODUCTION

Globally, nearly all (99%) maternal deaths occur in low income countries, mainly caused by non-utilisation of available delivery services or delays in accessing such services.<sup>1,2</sup> Indeed, about half of all births in South Asia still occur at home.<sup>3</sup> A number of interventions have been implemented to increase the rate of facility delivery and access to emergency obstetric care, including the establishment of birth centres and maternity waiting homes, reduction of user fees, provision of incentives and birth preparedness packages.<sup>4,5</sup> The 'safer mother programme' in Nepal provides free delivery services with incentives to women who deliver in a designated health facility.<sup>6</sup>

In Nepal, despite a substantial reduction in maternal mortality from 539 deaths per 100,000 live births in 1996 to 281 deaths per 100,000 in 2006, there has been no proportionate increase in utilisation of institutional delivery service.<sup>7</sup> The 2011 national survey reported that 65% of women still delivered at home and only 36% of births occurred in the presence of a skilled birth attendant,<sup>8</sup> whereas the national target is to achieve 60% of births via skilled birth attendants by 2015, in order to meet the Millennium Development Goal 5 target of 134 per 100,000 live births.<sup>9</sup> Therefore, utilisation of institutional delivery service is a major concern in Nepal.

According to the behavioural model proposed by Andersen, need factors are fundamental to healthcare seeking behaviour; that is, one should perceive a condition as susceptible and severe enough before seeking care to gain benefits.<sup>10</sup> For institutional delivery service utilisation, this means the pregnant woman and her family must recognise pregnancy and childbirth as abnormal events, so that life threatening situations may arise without any prediction.<sup>11</sup> In many low income countries including Nepal, pregnancy and childbirth are

1  
2  
3 often perceived as normal life events without justification to seek professional help.<sup>12, 13</sup> In  
4  
5 fact, need factors can be driven by pregnancy related factors such as awareness, health  
6  
7 knowledge of pregnancy and risk, importance given to pregnancy, community customs,  
8  
9 previous facility use, parity, and pregnancy complications.<sup>14</sup> Those women who perceive the  
10  
11 need for professional help and recognise the risk of pregnancy and delivery are expected to  
12  
13 make antenatal visits and prepare and arrange for childbirth.<sup>15</sup> Besides the immediate need,  
14  
15 utilisation of institutional delivery service can be affected by predisposing and enabling  
16  
17 factors as well as external environment factors. Figure 1 depicts the conceptual framework,  
18  
19 which is adapted from Andersen's behavioural model for the utilisation of health services.<sup>10</sup>  
20  
21  
22  
23  
24

25 Despite the important role of need factors, their effect on utilisation of institutional delivery  
26  
27 service has seldom been investigated in the context of safe motherhood programs. The aim of  
28  
29 the present study is to assess the contribution of need factors with respect to the utilisation of  
30  
31 institutional delivery service in Nepal, using data from the national Nepal Demographic  
32  
33 Health Survey (NDHS). Need factors were assessed by antenatal care visits and birth  
34  
35 preparedness activities.  
36  
37  
38  
39

## 40 **METHODS**

### 41 **Study setting**

42  
43 Nepal, with a population of 27.5 million, is divided into five developmental regions, each  
44  
45 extending from north to south. The country has also three ecological zones across east to  
46  
47 west: Terai, Hill and Mountain. These 15 sub-ecological regions are further divided into  
48  
49 smaller districts. Typically, each district has Village Development Committees (VDC) in  
50  
51 rural areas and municipalities in urban areas. Each VDC or municipality in turn consists of  
52  
53 small administrative units known as wards.  
54  
55  
56  
57  
58  
59  
60

### Data and sampling

The data for this study were obtained from the 2011 NDHS conducted by the Ministry of Health and Population. The 2011 NDHS survey was approved by the Nepal Health Research Council and data were accessible from MEASURE DHS project on request.<sup>16</sup> Details of the sampling methodology had been described elsewhere.<sup>8</sup> Briefly, the survey utilised a two-stage cluster sampling design with wards (enumeration areas) being the primary sampling units. The wards were stratified by sub-ecological domains and by rural-urban residency. In total, 11,085 households were selected as listing units from these 289 wards. Among them, 12,961 women aged 15-49 years were identified as eligible but individual interviews were only completed for 12,699 women, giving a response rate of 98%. This study focused on the subset of 4079 ever married women who had given birth within the past five years preceding the survey and who provided information on antenatal visits and preparation activities.

### Statistical analysis

The outcome variable was 'place of delivery': home versus facility (private or public). This binary variable was chosen instead of 'assisted deliveries' to emphasize the use of institutional delivery services and to avoid potential problem of inaccurate reporting of birth attendant skills. Perceived need factors investigated were (1) frequency of antenatal care visits and (2) birth preparedness. The latter referred to four preparation activities, namely, planning for a birth attendant, saving money, arrangement for transportation, and identification of potential blood donator.<sup>17</sup> Although the 2011 NDHS collected information on planning activities related to preparation of clothes, delivery kit and food, these activities did not necessarily imply the need for facility delivery; consequently, they were not considered as need factors of institutional delivery service use.

Table 1 gives the classification of variables used in this study. These variables were chosen in view of the conceptual framework of factors associated with utilisation of institutional delivery services (Figure 1). NDHS applied principal component analysis of a range of household assets to generate wealth quintiles. Ethnicity was categorised by three groups: upper caste (Hill Brahmin, Hill Cheetri, Terai Brahmin, Terai Cheetri), lower caste (Hill Dalit, Terai Dalit) and other (all other recorded ethnicities). Education was classified as none, primary (1-5 grade), secondary (6-10 grade), and higher (after 10<sup>th</sup> grade).

In the 2011 NDHS, enumeration areas were not allocated proportional to their population size, thus requiring adjustment by sampling weights prior to analysis. Such sampling weights were provided by the survey to account for cluster level variables and strata (domain) level variables. Based on these sampling weights, a complex sampling plan file was then prepared to perform logistic regression modelling, with need factors and other confounding factors listed in Table 1. All statistical analyses were conducted in the SPSS package version 21.

Table 1: Classification of variables used in the analysis (n = 4079)

| Variables                    | Categories | Weighted percentage | Unweighted count |
|------------------------------|------------|---------------------|------------------|
| <b>Place of delivery</b>     | Home       | 63.1                | 2397             |
|                              | Facility   | 36.9                | 1682             |
| <b>Antenatal care visits</b> | 0          | 15.2                | 611              |
|                              | 1          | 6.1                 | 234              |
|                              | 2          | 12.2                | 426              |
|                              | 3          | 16.4                | 657              |

|                                       |           |      |      |
|---------------------------------------|-----------|------|------|
|                                       | 4         | 19.7 | 901  |
|                                       | ≥ 5       | 30.4 | 1250 |
| <b>Birth preparedness<sup>#</sup></b> | 0         | 62.9 | 2476 |
|                                       | 1         | 33.3 | 1440 |
|                                       | ≥ 2       | 3.8  | 163  |
| <b>Women's age (years)</b>            | 15-19     | 7.1  | 306  |
|                                       | 20-24     | 33.4 | 1273 |
|                                       | 25-29     | 32.2 | 1335 |
|                                       | 30-49     | 27.3 | 1165 |
| <b>Women's education</b>              | None      | 47.3 | 1765 |
|                                       | Primary   | 20.0 | 817  |
|                                       | Secondary | 27.2 | 1225 |
|                                       | Higher    | 5.5  | 272  |
| <b>Partner's education</b>            | None      | 23.2 | 745  |
|                                       | Primary   | 24.5 | 989  |
|                                       | Secondary | 42.1 | 1815 |
|                                       | Higher    | 10.2 | 514  |
| <b>Parity</b>                         | 1         | 24.2 | 1248 |
|                                       | 2         | 30.6 | 1157 |
|                                       | 3         | 19.3 | 690  |
|                                       | 4         | 10.8 | 440  |
|                                       | ≥ 5       | 15.1 | 544  |
| <b>Wealth quintiles</b>               | 1         | 25.8 | 1160 |
|                                       | 2         | 21.9 | 832  |
|                                       | 3         | 21.0 | 739  |

|                             |             |      |      |
|-----------------------------|-------------|------|------|
|                             | 4           | 17.4 | 677  |
|                             | 5           | 13.9 | 671  |
| <b>Ethnicity</b>            | Other       | 52.1 | 1813 |
|                             | Upper caste | 30.1 | 1552 |
|                             | Lower caste | 17.8 | 703  |
| <b>Region</b>               | Mountain    | 7.9  | 742  |
|                             | Hill        | 39.5 | 1656 |
|                             | Terai       | 52.6 | 1681 |
| <b>Residential location</b> | Rural       | 90.7 | 3182 |
|                             | Urban       | 9.3  | 897  |

# Birth preparedness consists of four preparation activities (planning for a birth attendant, saving money, arrangement for transportation, and identification of potential blood donator)

## RESULTS

Table 1 shows the characteristics of the 4079 eligible women. About half of the participants had no education (47.3%) and came from the Terai region (52.6%). Almost two-third of them were between 20-29 years of age. Although half (50.1%) of the eligible women made four or more antenatal care visits, but 15.2% never visited a health facility before giving birth. The majority of mothers (62.9%) did not indicate any of the four birth preparation activities, while no women prepared for all four activities.

The overall facility delivery rate was found to be 36.9% (95% confidence interval (CI) 33.5% to 40.2%, SE 1.69). Table 2 presents the results of logistic regression analysis. The confounding factors used were women's age, women's education, partner's education, parity,

1  
2  
3 wealth quintiles, ethnicity, region and residential location from the NDHS 2011 data set. Both  
4  
5 need factors were positively associated with the facility delivery status. Even after  
6  
7 simultaneously adjusting the effects of predisposing, enabling, and external environment  
8  
9 factors, the two need factors remained statistically significant ( $p < 0.001$ ). In particular,  
10  
11 women who made five or more antenatal care visits were almost five times more likely to  
12  
13 deliver at a health facility when compared to those who paid no visit prior to delivery  
14  
15 (adjusted odds ratio (OR) 4.94, 95% CI 3.14 to 7.76). Similarly, the likelihood for facility  
16  
17 delivery increased by 3.4 fold among women who prepared for at least two of the four  
18  
19 activities, relative to their counterparts who chose to make no preparation (adjusted OR 3.41,  
20  
21 95% CI 2.01 to 5.58). The multivariable logistic regression analysis also confirmed that  
22  
23 wealth quintiles, residential location and higher parity were significantly associated with  
24  
25 place of delivery.  
26  
27  
28  
29  
30  
31

32 Table 2: Crude and adjusted odds ratios of facility delivery from logistic regression with  
33  
34 complex sampling analysis (n = 4079)  
35  
36  
37  
38

|                              | Crude odds ratio (95% CI) | Adjusted odds ratio (95% CI) | P*      |
|------------------------------|---------------------------|------------------------------|---------|
| <b>Need Factors</b>          |                           |                              |         |
| <b>Antenatal care visits</b> |                           |                              | < 0.001 |
| 0                            | 1                         | 1                            |         |
| 1                            | 1.79 (1.03, 3.10)         | 1.30 (0.72, 2.34)            |         |
| 2                            | 2.58 (1.62, 4.10)         | 1.75 (1.07, 2.93)            |         |
| 3                            | 4.18 (2.69, 6.50)         | 2.21 (1.39, 3.43)            |         |
| 4                            | 8.71 (5.40, 14.05)        | 4.13 (2.51, 6.44)            |         |



|    |                                       |                      |                   |         |
|----|---------------------------------------|----------------------|-------------------|---------|
| 1  |                                       |                      |                   |         |
| 2  |                                       |                      |                   |         |
| 3  | ≥ 5                                   | 17.89 (11.23, 28.51) | 4.94 (3.14, 7.76) |         |
| 4  |                                       |                      |                   |         |
| 5  | <b>Birth preparedness<sup>#</sup></b> |                      |                   | < 0.001 |
| 6  |                                       |                      |                   |         |
| 7  | 0                                     | 1                    | 1                 |         |
| 8  |                                       |                      |                   |         |
| 9  | 1                                     | 2.68 (2.18, 3.30)    | 1.52 (1.19, 1.88) |         |
| 10 |                                       |                      |                   |         |
| 11 | ≥ 2                                   | 9.31 (5.71, 15.17)   | 3.41 (2.01, 5.58) |         |
| 12 |                                       |                      |                   |         |
| 13 |                                       |                      |                   |         |
| 14 | <b>Confounding Factors</b>            |                      |                   |         |
| 15 |                                       |                      |                   |         |
| 16 | <b>Women's age (years)</b>            |                      |                   | 0.083   |
| 17 |                                       |                      |                   |         |
| 18 | 15-19                                 | 1                    | 1                 |         |
| 19 |                                       |                      |                   |         |
| 20 | 20-24                                 | 0.65 (0.49, 0.86)    | 0.65 (0.44, 0.97) |         |
| 21 |                                       |                      |                   |         |
| 22 | 25-29                                 | 0.56 (0.42, 0.75)    | 0.69 (0.48, 1.00) |         |
| 23 |                                       |                      |                   |         |
| 24 | 30-49                                 | 0.36 (0.26, 0.49)    | 0.80 (0.49, 1.32) |         |
| 25 |                                       |                      |                   |         |
| 26 |                                       |                      |                   |         |
| 27 | <b>Women's education</b>              |                      |                   | 0.216   |
| 28 |                                       |                      |                   |         |
| 29 | None                                  | 1                    | 1                 |         |
| 30 |                                       |                      |                   |         |
| 31 | Primary                               | 1.91 (1.46, 2.51)    | 1.08 (0.82, 1.42) |         |
| 32 |                                       |                      |                   |         |
| 33 | Secondary                             | 5.35 (4.25, 6.72)    | 1.29 (0.97, 1.71) |         |
| 34 |                                       |                      |                   |         |
| 35 | Higher                                | 20.28 (12.22, 33.65) | 1.67 (0.89, 3.12) |         |
| 36 |                                       |                      |                   |         |
| 37 |                                       |                      |                   |         |
| 38 | <b>Partner's education</b>            |                      |                   | 0.467   |
| 39 |                                       |                      |                   |         |
| 40 | None                                  | 1                    | 1                 |         |
| 41 |                                       |                      |                   |         |
| 42 | Primary                               | 1.61 (1.17, 2.21)    | 0.94 (0.67, 1.30) |         |
| 43 |                                       |                      |                   |         |
| 44 | Secondary                             | 3.62 (2.63, 4.98)    | 0.95 (0.67, 1.33) |         |
| 45 |                                       |                      |                   |         |
| 46 | Higher                                | 11.19 (7.34, 17.04)  | 1.28 (0.78, 2.09) |         |
| 47 |                                       |                      |                   |         |
| 48 |                                       |                      |                   |         |
| 49 | <b>Parity</b>                         |                      |                   | <0.001  |
| 50 |                                       |                      |                   |         |
| 51 | 1                                     | 1                    | 1                 |         |
| 52 |                                       |                      |                   |         |
| 53 | 2                                     | 0.44 (0.35, 0.54)    | 0.44 (0.34, 0.58) |         |
| 54 |                                       |                      |                   |         |
| 55 | 3                                     | 0.21 (0.16, 0.28)    | 0.39 (0.28, 0.54) |         |
| 56 |                                       |                      |                   |         |
| 57 |                                       |                      |                   |         |
| 58 |                                       |                      |                   |         |
| 59 |                                       |                      |                   |         |
| 60 |                                       |                      |                   |         |

|                                                                                                                              |                             |                      |                   |        |
|------------------------------------------------------------------------------------------------------------------------------|-----------------------------|----------------------|-------------------|--------|
|                                                                                                                              | 4                           | 0.18 (0.13, 0.25)    | 0.42 (0.28, 0.63) |        |
|                                                                                                                              | ≥ 5                         | 0.08 (0.06, 0.12)    | 0.30 (0.19, 0.49) |        |
| * From                                                                                                                       | <b>Wealth quintiles</b>     |                      |                   | <0.001 |
| multivariable logistic regression model                                                                                      | 1                           | 1                    | 1                 |        |
|                                                                                                                              | 2                           | 2.14 (1.68, 2.73)    | 1.58 (1.19, 2.11) |        |
|                                                                                                                              | 3                           | 3.73 (2.80, 4.96)    | 2.03 (1.44, 2.86) |        |
|                                                                                                                              | 4                           | 7.25 (5.33, 9.88)    | 2.73 (1.90, 3.94) |        |
| # Birth preparedness consists of four preparation activities (planning for a birth attendant, saving money, arrangements for | 5                           | 24.17 (17.51, 33.35) | 6.17 (3.94, 9.67) |        |
|                                                                                                                              | <b>Ethnicity</b>            |                      |                   | 0.607  |
|                                                                                                                              | Other                       | 1                    | 1                 |        |
|                                                                                                                              | Upper caste                 | 1.56 (1.22, 2.01)    | 1.08 (0.81, 1.42) |        |
|                                                                                                                              | Lower caste                 | 0.72 (0.57, 0.92)    | 1.16 (0.85, 1.59) |        |
|                                                                                                                              | <b>Region</b>               |                      |                   | 0.244  |
|                                                                                                                              | Mountain                    | 1                    | 1                 |        |
|                                                                                                                              | Hill                        | 1.94 (1.28, 2.95)    | 1.28 (0.86, 1.92) |        |
|                                                                                                                              | Terai                       | 2.78 (1.86, 4.14)    | 1.43 (0.94, 2.19) |        |
|                                                                                                                              | <b>Residential Location</b> |                      |                   | <0.001 |
|                                                                                                                              | Rural                       | 1                    | 1                 |        |
|                                                                                                                              | Urban                       | 5.19 (3.99, 6.75)    | 2.42 (1.83, 3.19) |        |

transportation, and identification of potential blood donor)

## DISCUSSION

The national survey data revealed the majority of Nepalese mothers did not prepare any of the four activities and only half of the women made the recommended 4 or more antenatal

1  
2  
3 care visits, despite birth preparedness has been incorporated into the national safe  
4  
5 motherhood program since 2009.<sup>12</sup> Female community health volunteers and facility-based  
6  
7 health workers use pictorial charts to educate women on obstetric danger signs. While  
8  
9 preparedness level can be high in some districts,<sup>18</sup> overall birth preparedness is still low. The  
10  
11 variations between districts may be attributed to differences in human development indexes  
12  
13 including adult literacy, women empowerment and physical accessibility to health facilities.  
14  
15

16  
17  
18 Overall, the preparation and antenatal visit record suggested that women might have no  
19  
20 intention or might not perceive the need of giving birth at a health facility. Such perception of  
21  
22 need can also be influenced by distance and quality of maternity services.<sup>14,19</sup> Indeed, the  
23  
24 facility delivery rate was found to be only 36.9%. In the traditional Nepalese society,  
25  
26 childbirth continues to take place at home, while many women still hold the view that facility  
27  
28 delivery is unnecessary. On the other hand, those women who were prepared and made  
29  
30 antenatal visits tended to give birth at facilities. Our results confirmed the strong contribution  
31  
32 by these need factors to actual facility utilisation irrespective of predisposing, enabling, and  
33  
34 external environment factors. Apart from the need factors, parity, wealth status and  
35  
36 residential location also play a significant role in the choice of delivery place.  
37  
38  
39  
40  
41  
42

43 Although the frequency of antenatal care visits was associated with subsequent facility  
44  
45 delivery, the relationship appeared to be dose-dependent,<sup>14, 18</sup> as in the case of the present  
46  
47 study whereby making a single visit induced no significant impact; whereas previous studies  
48  
49 undertaken in Tanzania observed high use of antenatal care but low use of facility delivery.<sup>20,</sup>  
50

51  
52 <sup>21</sup> Making the recommended four or more antenatal care visits might reflect the woman's  
53  
54 concern of her pregnancy, pregnancy complications and the need for professional help.<sup>14, 22</sup>  
55  
56  
57  
58  
59  
60

1  
2  
3 Consequently, informing women about danger signs and providing quality antenatal care with  
4 provision of iron tablets and blood check might encourage women to attend antenatal visits.  
5  
6  
7

8  
9  
10 The link between birth preparedness activities and facility delivery was supported by recent  
11 literature. A prospective cohort study of 701 pregnant women in the Kaski district of Nepal  
12 found preparation activities could increase the facility delivery rate.<sup>18</sup> Similarly, a  
13 randomised trial in Tanzania demonstrated that skilled delivery care uptake was 16.8% higher  
14 among women who had been counselled on promotion of birth plan than others without such  
15 counselling.<sup>23</sup> Raising awareness and help for birth plan also led to increased facility  
16 utilisation in other intervention studies conducted in Burkina Faso, Bangladesh and Eritrea.  
17  
18  
19  
20  
21  
22  
23  
24  
25  
26  
27  
28  
29  
30  
31  
32  
33  
34  
35  
36  
37  
38  
39  
40  
41  
42  
43  
44  
45  
46  
47  
48  
49  
50  
51  
52  
53  
54  
55  
56  
57  
58  
59  
60  
24-26. However, two pre-post evaluation studies of birth preparedness in southern districts of  
Nepal reported that increased preparedness level was not significantly translated into  
increased facility delivery.<sup>27, 28</sup>

The findings have important implications for safe motherhood program in Nepal and other  
low income countries. Because the intention to deliver at a health facility can be largely  
influenced by need factors, women should be extensively counselled and convinced of the  
benefits and safety of facility delivery. Any behavioural intervention such as birth  
preparedness package and complication readiness is unlikely to be successful unless attaining  
a high level capable to change the women's attitude and intention. Counselling can be  
performed by health professionals, preferably female health workers at a health facility or by  
female community health volunteers at household visits. Further, local teachers and social  
workers can be involved in awareness raising campaigns. Community networks and mother  
clubs can also provide support in terms of money and transport management.

1  
2  
3 The strength of the present study was the use of a nationally representative large sample of  
4  
5 married women with a high response rate. However, information was lacking on some known  
6  
7 determinants of facility delivery utilisation, particularly quality of providers and distance and  
8  
9 transportation to facility. These variables were unavailable from the NDHS 2011 database  
10  
11 and posed as the major limitation. Nevertheless, the external factors 'residential location' and  
12  
13 'region' have provided some proxy information to partially compensate the effect of distance  
14  
15 and service availability. Institutional delivery services in Terai and urban areas are more  
16  
17 physically accessible than in hilly or mountainous parts of the country. The regression model  
18  
19 has accounted for region and location as well as other known predisposing and enabling  
20  
21 factors.  
22  
23  
24  
25  
26

## 27 **CONCLUSION**

28  
29 Utilisation of institutional delivery services remained low in Nepal. The majority of mothers  
30  
31 were not prepared for childbirth and only half the women made the recommended four or  
32  
33 more antenatal care visits, indicating their perceived lack of need for facility delivery. The  
34  
35 national data confirmed the strong associations between such need factors and institutional  
36  
37 delivery service utilisation. This has implications for behavioural interventions such as birth  
38  
39 preparedness and complication readiness, which aim to change their intention to deliver at a  
40  
41 health facility. Birth preparedness packages in Nepal should be continued and future  
42  
43 interventions should target the need factors.  
44  
45  
46  
47  
48  
49  
50  
51  
52  
53  
54  
55  
56  
57  
58  
59  
60

### **Acknowledgements**

The authors are grateful to the ICF International, Calverton, Maryland, USA, for providing the data for this study.

### **Contributors**

RK conceived the study design, performed data analysis and drafted the manuscript. AHL supervised the statistical analysis and revised the paper. VK prepared the data set and assisted with interpretation of the data. All three authors have read and approved the final version for publication.

### **Competing Interests**

None declared for all authors.

### **Data sharing statement**

Data of 2011 Nepal Demographic and Health Survey can be obtained from MEASURE DHS ICF International, Calverton, Maryland, USA.

## REFERENCES

1. World Health Organization. *Trends in maternal mortality 1990 to 2010*. WHO, UNICEF, UNFPA and World Bank. WHO, Geneva, Switzerland,2012.
2. Ronsmans C, Graham WJ. Maternal mortality: who, when, where, and why. *The Lancet* 2006;368(9542):1189-200.
3. United Nations. *The Millenium Development goals Report 2013*. New York: United Nations,2013.
4. Metcalfe R, Adegoke AA. Strategies to increase facility-based skilled birth attendance in South Asia: a literature review. *International Health* 2013;5(2):96-105.
5. De Brouwere V, Richard F, Witter S. Access to maternal and perinatal health services: lessons from successful and less successful examples of improving access to safe delivery and care of the newborn. *Trop Med Int Health* 2010;15(8):901-9.
6. Karkee R, Lee A, Binns C. Determinants of facility delivery after implementation of safer mother programme in Nepal: a prospective cohort study. *BMC Pregnancy Childbirth* 2013;13(1):193.
7. Karkee R. How did Nepal reduce the maternal mortality? A result from analysing the determinants of maternal mortality. *Journal of Nepal Medical Association* 2012;52(186):88-94.
8. MoHP [Nepal], New ERA, ICF International Inc. *Nepal Demographic and Health Survey 2011*. Kathmandu, Nepal and Calverton, Maryland: Ministry of Health and Population [Nepal], New ERA, and ICF International Inc.,2012.
9. National Planning Commission/UN Country Team of Nepal. *Nepal Millennium Development Goals Progress Report 2010*. Kathmandu: National Planning Commission, Government of Nepal/UN Country Team of Nepal,2010.

- 1  
2  
3 10. Andersen RM. Revisiting the Behavioral Model and Access to Medical Care: Does it  
4  
5 Matter? *J Health Soc Behav* 1995;36(1):1-10.  
6  
7  
8 11. Thaddeus S, Maine D. Too far to walk: Maternal mortality in context. *Social Science  
9  
10 and Medicine* 1994;38(8):1091-110.  
11  
12 12. Pradhan A, Suvedi BK, Barnett S, et al. Nepal Maternal Mortality and Morbidity  
13  
14 Study 2008/2009.: Ministry of Health and Population, Government of Nepal,  
15  
16 Kathmandu,2010.  
17  
18 13. Agus Y, Shigeko H, Porter SE. Rural Indonesia women's traditional beliefs about  
19  
20 antenatal care. *BMC Res Notes* 2012589.  
21  
22  
23 14. Gabrysch S, Campbell OMR. Still too far to walk: Literature review of the  
24  
25 determinants of delivery service use. *BMC Pregnancy Childbirth* 2009;934.  
26  
27  
28 15. JHPIEGO. *Behaviour change intervention for safe motherhood: common problems,  
29  
30 unique solutions*. Baltimore: JHPIEGO, Maternal and Neonatal Health  
31  
32 Programme,2004.  
33  
34 16. MEASURE DHS/ ICF International.  
35  
36 [http://www.measuredhs.com/data/dataset/Nepal\\_Standard-DHS\\_2011.cfm?flag=0](http://www.measuredhs.com/data/dataset/Nepal_Standard-DHS_2011.cfm?flag=0)  
37  
38 (accessed 15 Jan 2014),  
39  
40  
41 17. JHPIEGO. Monitoring birth preparedness and complication readiness, tools and  
42  
43 indicators for maternal and newborn health. Baltimore: JHPIEGO, Maternal and  
44  
45 Neonatal Health Programme; 2004.  
46  
47  
48 18. Karkee R, Lee A, Binns C. Birth preparedness and skilled attendance at birth in  
49  
50 Nepal: Implications for achieving Millennium Development Goal 5. *Midwifery*  
51  
52 2013;29(10):1206-10.  
53  
54 19. Acharya LB, Cleland J. Maternal and child health services in rural Nepal: does access  
55  
56 or quality matter more? *Health Policy Plan* 2000;15(2):223-29.  
57  
58  
59  
60



- 1  
2  
3 20. Mpembeni RNM, Killewo JZ, Leshabari MT, et al. Use pattern of maternal health  
4 services and determinants of skilled care during delivery in Southern Tanzania:  
5 Implications for achievement of MDG-5 targets. *BMC Pregnancy Childbirth* 2007;7.  
6  
7  
8  
9  
10 21. Magoma M, Requejo J, Campbell O, et al. High ANC coverage and low skilled  
11 attendance in a rural Tanzanian district: a case for implementing a birth plan  
12 intervention. *BMC Pregnancy Childbirth* 2010;10(1):13.  
13  
14  
15  
16 22. Titaley C, Dibley M, Roberts C. Factors associated with underutilization of antenatal  
17 care services in Indonesia: results of Indonesia Demographic and Health Survey  
18 2002/2003 and 2007. *BMC Public Health* 2010;10(1):485.  
19  
20  
21  
22  
23 23. Magoma M, Requejo J, Campbell O, et al. The effectiveness of birth plans in  
24 increasing use of skilled care at delivery and postnatal care in rural Tanzania: a cluster  
25 randomised trial. *Trop Med Int Health* 2013;18(4):435-43.  
26  
27  
28  
29  
30 24. Brazier E, Andrzejewski C, Perkins ME, et al. Improving poor women's access to  
31 maternity care: Findings from a primary care intervention in Burkina Faso. *Social  
32 Science and Medicine* 2009;69(5):682-90.  
33  
34  
35  
36 25. Hossain J, Ross SR. The effect of addressing demand for as well as supply of  
37 emergency obstetric care in Dinajpur, Bangladesh. *International Journal of  
38 Gynecology & Obstetrics* 2006;92(3):320-28.  
39  
40  
41  
42  
43 26. Turan JM, Tesfagiorgis M, Polan ML. Evaluation of a Community Intervention for  
44 Promotion of Safe Motherhood in Eritrea. *The Journal of Midwifery & Women's  
45 Health* 2011;56(1):8-17.  
46  
47  
48  
49 27. McPherson R, Khadka N, Moore J, et al. Are birth-preparedness programmes  
50 effective? Results from a field trial in Siraha district, Nepal. *Journal Health  
51 Population Nutrition* 2006;24:79-88.  
52  
53  
54  
55  
56  
57  
58  
59  
60

- 1  
2  
3 28. Hodgins S, McPherson R, Suvedi BK, et al. Testing a scalable community-based  
4 approach to improve maternal and neonatal health in rural Nepal. *J Perinatol*  
5  
6 2010;30(6):388-95.  
7  
8  
9  
10  
11  
12  
13  
14  
15  
16  
17  
18  
19  
20  
21  
22  
23  
24  
25  
26  
27  
28  
29  
30  
31  
32  
33  
34  
35  
36  
37  
38  
39  
40  
41  
42  
43  
44  
45  
46  
47  
48  
49  
50  
51  
52  
53  
54  
55  
56  
57  
58  
59  
60

For peer review only

1  
2  
3 **Need factors for utilisation of institutional delivery services in Nepal: an**  
4  
5 **analysis from Nepal Demographic and Health Survey, 2011**  
6  
7  
8  
9

10 Rajendra Karkee\*, Andy H. Lee, Vishnu Khanal

11  
12  
13  
14  
15 Rajendra Karkee\*

16  
17 School of Public Health and Community Medicine, BP Koirala Institute of Health Sciences,

18  
19 Dharan, Nepal

20  
21 E-mail: rkarkee@gmail.com  
22  
23  
24  
25

26  
27 Andy H. Lee

28  
29 School of Public Health, Curtin University, Perth, WA, Australia

30  
31 E-mail: Andy.Lee@curtin.edu.au  
32  
33  
34

35  
36 Vishnu Khanal

37  
38 Sanjeevani College of Medical Sciences, Butwal, Rupandehi, Nepal

39  
40 E-mail: khanal.vishnu@gmail.com  
41  
42  
43

44 **\* Corresponding author**

45  
46 School of Public Health and Community Medicine, BP Koirala Institute of Health Sciences,

47  
48 Dharan, Nepal

49  
50 Phone: +977 98420 64635 E-mail: rkarkee@gmail.com  
51  
52  
53  
54

55 **Keywords:** birth preparedness, facility delivery, maternity service, need factors, Nepal

56  
57 **Word count:** 2896  
58  
59  
60

## ABSTRACT

**Objectives:** This study aims to assess the role of need factors with respect to the utilisation of institutional delivery services in Nepal.

**Design:** An analytic study was conducted using a subset of 4079 ever married women from the 2011 Nepal Demographic and Health Survey, which utilised two-stage cluster sampling. Logistic regression with complex sample analysis was performed to evaluate the effects of antenatal care visits and birth preparedness activities on facility delivery.

**Outcome measures:** facility delivery

**Results:** Overall facility delivery rate was low at 36.9% (95% CI 33.5% to 40.2%, SE 1.69).

Only half (50.1%) of the women made four or more antenatal care visits while 62.9% (95% CI 59.9% to 65.8%, SE 1.51) did not indicate any of the four birth preparation activities.

After adjusting for external, predisposing and enabling factors, women who made more than four antenatal care visits were five times more likely to deliver at a health facility when compared to those who paid no visit (adjusted odds ratio 4.94, 95% CI 3.14 to 7.76).

Similarly, the likelihood for facility delivery increased by 3.4 fold among women who prepared for at least two of the four activities compared to their counterparts who made no preparation (adjusted odds ratio 3.41, 95% CI 2.01 to 5.58).

**Conclusion:** The perceived need, as expressed by the frequency of antenatal care visits and birth preparedness activities, plays an important role in institutional delivery service utilisation for Nepalese women. These findings have implications for behavioural interventions to change their intention to deliver at a health facility.

## Article Summary

### Strength and limitations

- This study used the nationally representative large sample of married women from the 2011 Nepal Demographic and Health Survey with a high response rate.
- Information was not available on some known determinants of facility delivery utilisation, particularly quality of providers, and distance and transportation to facility.
- Perceived need of facility delivery was assessed by antenatal visits and birth preparedness activities, which were positively associated with facility delivery utilisation.

## INTRODUCTION

Globally, nearly all (99%) maternal deaths occur in low income countries, mainly caused by non-utilisation of available delivery services or delays in accessing such services.<sup>1,2</sup> Indeed, about half of all births in South Asia still occur at home.<sup>3</sup> A number of interventions have been implemented to increase the rate of facility delivery and access to emergency obstetric care, including the establishment of birth centres and maternity waiting homes, reduction of user fees, provision of incentives and birth preparedness packages.<sup>4,5</sup> The 'safer mother programme' in Nepal provides free delivery services with incentives to women who deliver in a designated health facility.<sup>6</sup>

In Nepal, despite a substantial reduction in maternal mortality from 539 deaths per 100,000 live births in 1996 to 281 deaths per 100,000 in 2006, there has been no proportionate increase in utilisation of institutional delivery service.<sup>7</sup> The 2011 national survey reported that 65% of women still delivered at home and only 36% of births occurred in the presence of a skilled birth attendant,<sup>8</sup> whereas the national target is to achieve 60% of births via skilled birth attendants by 2015, in order to meet the Millennium Development Goal 5 target of 134 per 100,000 live births.<sup>9</sup> Therefore, utilisation of institutional delivery service is a major concern in Nepal.

According to the behavioural model proposed by Andersen, need factors are fundamental to healthcare seeking behaviour; that is, one should perceive a condition as susceptible and severe enough before seeking care to gain benefits.<sup>10</sup> For institutional delivery service utilisation, this means the pregnant woman and her family must recognise pregnancy and childbirth as abnormal events, so that life threatening situations may arise without any prediction.<sup>11</sup> In many low income countries including Nepal, pregnancy and childbirth are

1  
2  
3 often perceived as normal life events without justification to seek professional help.<sup>12, 13</sup> In  
4  
5 fact, need factors can be driven by pregnancy related factors such as awareness, health  
6  
7 knowledge of pregnancy and risk, importance given to pregnancy, community customs,  
8  
9 previous facility use, parity, and pregnancy complications.<sup>14</sup> Those women who perceive the  
10  
11 need for professional help and recognise the risk of pregnancy and delivery are expected to  
12  
13 make antenatal visits and prepare and arrange for childbirth.<sup>15</sup> Besides the immediate need,  
14  
15 utilisation of institutional delivery service can be affected by predisposing and enabling  
16  
17 factors as well as external environment factors. Figure 1 depicts the conceptual framework,  
18  
19 which is adapted from Andersen's behavioural model for the utilisation of health services.<sup>10</sup>  
20  
21  
22  
23  
24

25 Despite the important role of need factors, their effect on utilisation of institutional delivery  
26  
27 service has seldom been investigated in the context of safe motherhood programs. The aim of  
28  
29 the present study is to assess the contribution of need factors with respect to the utilisation of  
30  
31 institutional delivery service in Nepal, using data from the national Nepal Demographic  
32  
33 Health Survey (NDHS). Need factors were assessed by antenatal care visits and birth  
34  
35 preparedness activities.  
36  
37  
38  
39

## 40 **METHODS**

### 41 **Study setting**

42  
43 Nepal, with a population of 27.5 million, is divided into five developmental regions, each  
44  
45 extending from north to south. The country has also three ecological zones across east to  
46  
47 west: Terai, Hill and Mountain. These 15 sub-ecological regions are further divided into  
48  
49 smaller districts. Typically, each district has Village Development Committees (VDC) in  
50  
51 rural areas and municipalities in urban areas. Each VDC or municipality in turn consists of  
52  
53 small administrative units known as wards.  
54  
55  
56  
57  
58  
59  
60

### Data and sampling

The data for this study were obtained from the 2011 NDHS conducted by the Ministry of Health and Population. The 2011 NDHS survey was approved by the Nepal Health Research Council and data were accessible from MEASURE DHS project on request.<sup>16</sup> Details of the sampling methodology had been described elsewhere.<sup>8</sup> Briefly, the survey utilised a two-stage cluster sampling design with wards (enumeration areas) being the primary sampling units. The wards were stratified by sub-ecological domains and by rural-urban residency. In total, 11,085 households were selected as listing units from these 289 wards. Among them, 12,961 women aged 15-49 years were identified as eligible but individual interviews were only completed for 12,699 women, giving a response rate of 98%. This study focused on the subset of 4079 ever married women who had given birth within the past five years preceding the survey and who provided information on antenatal visits and preparation activities.

### Statistical analysis

The outcome variable was 'place of delivery': home versus facility (private or public). This binary variable was chosen instead of 'assisted deliveries' to emphasize the use of institutional delivery services and to avoid potential problem of inaccurate reporting of birth attendant skills. Perceived need factors investigated were (1) frequency of antenatal care visits and (2) birth preparedness. The latter referred to four preparation activities, namely, planning for a birth attendant, saving money, arrangement for transportation, and identification of potential blood donator.<sup>17</sup> Although the 2011 NDHS collected information on planning activities related to preparation of clothes, delivery kit and food, these activities did not necessarily imply the need for facility delivery; consequently, they were not considered as need factors of institutional delivery service use.



Table 1 gives the classification of variables used in this study. These variables were chosen in view of the conceptual framework of factors associated with utilisation of institutional delivery services (Figure 1). NDHS applied principal component analysis of a range of household assets to generate wealth quintiles. Ethnicity was categorised by three groups: upper caste (Hill Brahmin, Hill Cheetri, Terai Brahmin, Terai Cheetri), lower caste (Hill Dalit, Terai Dalit) and other (all other recorded ethnicities). Education was classified as none, primary (1-5 grade), secondary (6-10 grade), and higher (after 10<sup>th</sup> grade).

In the 2011 NDHS, enumeration areas were not allocated proportional to their population size, thus requiring adjustment by sampling weights prior to analysis. Such sampling weights were provided by the survey to account for cluster level variables and strata (domain) level variables. Based on these sampling weights, a complex sampling plan file was then prepared to perform logistic regression modelling, with need factors and other confounding factors listed in Table 1. All statistical analyses were conducted in the SPSS package version 21.

Table 1: Classification of variables used in the analysis (n = 4079)

| Variables                    | Categories | Weighted percentage | Unweighted count |
|------------------------------|------------|---------------------|------------------|
| <b>Place of delivery</b>     | Home       | 63.1                | 2397             |
|                              | Facility   | 36.9                | 1682             |
| <b>Antenatal care visits</b> | 0          | 15.2                | 611              |
|                              | 1          | 6.1                 | 234              |
|                              | 2          | 12.2                | 426              |
|                              | 3          | 16.4                | 657              |

|                                       |           |      |      |
|---------------------------------------|-----------|------|------|
|                                       | 4         | 19.7 | 901  |
|                                       | ≥ 5       | 30.4 | 1250 |
| <b>Birth preparedness<sup>#</sup></b> | 0         | 62.9 | 2476 |
|                                       | 1         | 33.3 | 1440 |
|                                       | ≥ 2       | 3.8  | 163  |
| <b>Women's age (years)</b>            | 15-19     | 7.1  | 306  |
|                                       | 20-24     | 33.4 | 1273 |
|                                       | 25-29     | 32.2 | 1335 |
|                                       | 30-49     | 27.3 | 1165 |
| <b>Women's education</b>              | None      | 47.3 | 1765 |
|                                       | Primary   | 20.0 | 817  |
|                                       | Secondary | 27.2 | 1225 |
|                                       | Higher    | 5.5  | 272  |
| <b>Partner's education</b>            | None      | 23.2 | 745  |
|                                       | Primary   | 24.5 | 989  |
|                                       | Secondary | 42.1 | 1815 |
|                                       | Higher    | 10.2 | 514  |
| <b>Parity</b>                         | 1         | 24.2 | 1248 |
|                                       | 2         | 30.6 | 1157 |
|                                       | 3         | 19.3 | 690  |
|                                       | 4         | 10.8 | 440  |
|                                       | ≥ 5       | 15.1 | 544  |
| <b>Wealth quintiles</b>               | 1         | 25.8 | 1160 |
|                                       | 2         | 21.9 | 832  |
|                                       | 3         | 21.0 | 739  |

|                             |             |      |      |
|-----------------------------|-------------|------|------|
|                             | 4           | 17.4 | 677  |
|                             | 5           | 13.9 | 671  |
| <b>Ethnicity</b>            | Other       | 52.1 | 1813 |
|                             | Upper caste | 30.1 | 1552 |
|                             | Lower caste | 17.8 | 703  |
| <b>Region</b>               | Mountain    | 7.9  | 742  |
|                             | Hill        | 39.5 | 1656 |
|                             | Terai       | 52.6 | 1681 |
| <b>Residential location</b> | Rural       | 90.7 | 3182 |
|                             | Urban       | 9.3  | 897  |

---

# Birth preparedness consists of four preparation activities (planning for a birth attendant, saving money, arrangement for transportation, and identification of potential blood donator)

## RESULTS

Table 1 shows the characteristics of the 4079 eligible women. About half of the participants had no education (47.3%) and came from the Terai region (52.6%). Almost two-third of them were between 20-29 years of age. Although half (50.1%) of the eligible women made four or more antenatal care visits, but 15.2% never visited a health facility before giving birth. The majority of mothers (62.9%) did not indicate any of the four birth preparation activities, while no women prepared for all four activities.

The overall facility delivery rate was found to be 36.9% (95% confidence interval (CI) 33.5% to 40.2%, SE 1.69). Table 2 presents the results of logistic regression analysis. The confounding factors used were women's age, women's education, partner's education, parity,

1  
2  
3 wealth quintiles, ethnicity, region and residential location from the NDHS 2011 data set. Both  
4  
5 need factors were positively associated with the facility delivery status. Even after  
6  
7 simultaneously adjusting the effects of predisposing, enabling, and external environment  
8  
9 factors, the two need factors remained statistically significant ( $p < 0.001$ ). In particular,  
10  
11 women who made five or more antenatal care visits were almost five times more likely to  
12  
13 deliver at a health facility when compared to those who paid no visit prior to delivery  
14  
15 (adjusted odds ratio (OR) 4.94, 95% CI 3.14 to 7.76). Similarly, the likelihood for facility  
16  
17 delivery increased by 3.4 fold among women who prepared for at least two of the four  
18  
19 activities, relative to their counterparts who chose to make no preparation (adjusted OR 3.41,  
20  
21 95% CI 2.01 to 5.58). **The multivariable logistic regression analysis also confirmed that**  
22  
23 **wealth quintiles, residential location and higher parity were significantly associated with**  
24  
25 **place of delivery.**  
26  
27  
28  
29  
30  
31

32 Table 2: Crude and adjusted odds ratios of facility delivery from logistic regression with  
33  
34 complex sampling analysis (n = 4079)  
35  
36  
37  
38

|                              | Crude odds ratio (95% CI) | Adjusted odds ratio (95% CI) | P*      |
|------------------------------|---------------------------|------------------------------|---------|
| <b>Need Factors</b>          |                           |                              |         |
| <b>Antenatal care visits</b> |                           |                              | < 0.001 |
| 0                            | 1                         | 1                            |         |
| 1                            | 1.79 (1.03, 3.10)         | 1.30 (0.72, 2.34)            |         |
| 2                            | 2.58 (1.62, 4.10)         | 1.75 (1.07, 2.93)            |         |
| 3                            | 4.18 (2.69, 6.50)         | 2.21 (1.39, 3.43)            |         |
| 4                            | 8.71 (5.40, 14.05)        | 4.13 (2.51, 6.44)            |         |

|    |                                       |                      |                   |         |
|----|---------------------------------------|----------------------|-------------------|---------|
| 1  |                                       |                      |                   |         |
| 2  |                                       |                      |                   |         |
| 3  | ≥ 5                                   | 17.89 (11.23, 28.51) | 4.94 (3.14, 7.76) |         |
| 4  |                                       |                      |                   |         |
| 5  | <b>Birth preparedness<sup>#</sup></b> |                      |                   | < 0.001 |
| 6  |                                       |                      |                   |         |
| 7  | 0                                     | 1                    | 1                 |         |
| 8  |                                       |                      |                   |         |
| 9  | 1                                     | 2.68 (2.18, 3.30)    | 1.52 (1.19, 1.88) |         |
| 10 |                                       |                      |                   |         |
| 11 | ≥ 2                                   | 9.31 (5.71, 15.17)   | 3.41 (2.01, 5.58) |         |
| 12 |                                       |                      |                   |         |
| 13 |                                       |                      |                   |         |
| 14 | <b>Confounding Factors</b>            |                      |                   |         |
| 15 |                                       |                      |                   |         |
| 16 | <b>Women's age (years)</b>            |                      |                   | 0.083   |
| 17 |                                       |                      |                   |         |
| 18 | 15-19                                 | 1                    | 1                 |         |
| 19 |                                       |                      |                   |         |
| 20 | 20-24                                 | 0.65 (0.49, 0.86)    | 0.65 (0.44, 0.97) |         |
| 21 |                                       |                      |                   |         |
| 22 | 25-29                                 | 0.56 (0.42, 0.75)    | 0.69 (0.48, 1.00) |         |
| 23 |                                       |                      |                   |         |
| 24 | 30-49                                 | 0.36 (0.26, 0.49)    | 0.80 (0.49, 1.32) |         |
| 25 |                                       |                      |                   |         |
| 26 |                                       |                      |                   |         |
| 27 | <b>Women's education</b>              |                      |                   | 0.216   |
| 28 |                                       |                      |                   |         |
| 29 | None                                  | 1                    | 1                 |         |
| 30 |                                       |                      |                   |         |
| 31 | Primary                               | 1.91 (1.46, 2.51)    | 1.08 (0.82, 1.42) |         |
| 32 |                                       |                      |                   |         |
| 33 | Secondary                             | 5.35 (4.25, 6.72)    | 1.29 (0.97, 1.71) |         |
| 34 |                                       |                      |                   |         |
| 35 | Higher                                | 20.28 (12.22, 33.65) | 1.67 (0.89, 3.12) |         |
| 36 |                                       |                      |                   |         |
| 37 |                                       |                      |                   |         |
| 38 | <b>Partner's education</b>            |                      |                   | 0.467   |
| 39 |                                       |                      |                   |         |
| 40 | None                                  | 1                    | 1                 |         |
| 41 |                                       |                      |                   |         |
| 42 | Primary                               | 1.61 (1.17, 2.21)    | 0.94 (0.67, 1.30) |         |
| 43 |                                       |                      |                   |         |
| 44 | Secondary                             | 3.62 (2.63, 4.98)    | 0.95 (0.67, 1.33) |         |
| 45 |                                       |                      |                   |         |
| 46 | Higher                                | 11.19 (7.34, 17.04)  | 1.28 (0.78, 2.09) |         |
| 47 |                                       |                      |                   |         |
| 48 |                                       |                      |                   |         |
| 49 | <b>Parity</b>                         |                      |                   | <0.001  |
| 50 |                                       |                      |                   |         |
| 51 | 1                                     | 1                    | 1                 |         |
| 52 |                                       |                      |                   |         |
| 53 | 2                                     | 0.44 (0.35, 0.54)    | 0.44 (0.34, 0.58) |         |
| 54 |                                       |                      |                   |         |
| 55 | 3                                     | 0.21 (0.16, 0.28)    | 0.39 (0.28, 0.54) |         |
| 56 |                                       |                      |                   |         |
| 57 |                                       |                      |                   |         |
| 58 |                                       |                      |                   |         |
| 59 |                                       |                      |                   |         |
| 60 |                                       |                      |                   |         |

|                                                                                                                                                                                           |                             |                      |                   |        |
|-------------------------------------------------------------------------------------------------------------------------------------------------------------------------------------------|-----------------------------|----------------------|-------------------|--------|
|                                                                                                                                                                                           | 4                           | 0.18 (0.13, 0.25)    | 0.42 (0.28, 0.63) |        |
|                                                                                                                                                                                           | ≥ 5                         | 0.08 (0.06, 0.12)    | 0.30 (0.19, 0.49) |        |
| * From                                                                                                                                                                                    | <b>Wealth quintiles</b>     |                      |                   | <0.001 |
| multivariable logistic regression model                                                                                                                                                   | 1                           | 1                    | 1                 |        |
|                                                                                                                                                                                           | 2                           | 2.14 (1.68, 2.73)    | 1.58 (1.19, 2.11) |        |
|                                                                                                                                                                                           | 3                           | 3.73 (2.80, 4.96)    | 2.03 (1.44, 2.86) |        |
|                                                                                                                                                                                           | 4                           | 7.25 (5.33, 9.88)    | 2.73 (1.90, 3.94) |        |
| # Birth preparedness consists of four preparation activities (planning for a birth attendant, saving money, arrangements for transportation, and identification of potential blood donor) | 5                           | 24.17 (17.51, 33.35) | 6.17 (3.94, 9.67) |        |
|                                                                                                                                                                                           | <b>Ethnicity</b>            |                      |                   | 0.607  |
|                                                                                                                                                                                           | Other                       | 1                    | 1                 |        |
|                                                                                                                                                                                           | Upper caste                 | 1.56 (1.22, 2.01)    | 1.08 (0.81, 1.42) |        |
|                                                                                                                                                                                           | Lower caste                 | 0.72 (0.57, 0.92)    | 1.16 (0.85, 1.59) |        |
|                                                                                                                                                                                           | <b>Region</b>               |                      |                   | 0.244  |
|                                                                                                                                                                                           | Mountain                    | 1                    | 1                 |        |
|                                                                                                                                                                                           | Hill                        | 1.94 (1.28, 2.95)    | 1.28 (0.86, 1.92) |        |
|                                                                                                                                                                                           | Terai                       | 2.78 (1.86, 4.14)    | 1.43 (0.94, 2.19) |        |
|                                                                                                                                                                                           | <b>Residential Location</b> |                      |                   | <0.001 |
|                                                                                                                                                                                           | Rural                       | 1                    | 1                 |        |
|                                                                                                                                                                                           | Urban                       | 5.19 (3.99, 6.75)    | 2.42 (1.83, 3.19) |        |

transportation, and identification of potential blood donor)

## DISCUSSION

The national survey data revealed the majority of Nepalese mothers did not prepare any of the four activities and only half of the women made the recommended 4 or more antenatal

1  
2  
3 care visits, despite birth preparedness has been incorporated into the national safe  
4  
5 motherhood program since 2009.<sup>12</sup> Female community health volunteers and facility-based  
6  
7 health workers use pictorial charts to educate women on obstetric danger signs. While  
8  
9 preparedness level can be high in some districts,<sup>18</sup> overall birth preparedness is still low. The  
10  
11 variations between districts may be attributed to differences in human development indexes  
12  
13 including adult literacy, women empowerment and physical accessibility to health facilities.  
14  
15

16  
17  
18 Overall, the preparation and antenatal visit record suggested that women might have no  
19  
20 intention or might not perceive the need of giving birth at a health facility. Such perception of  
21  
22 need can also be influenced by distance and quality of maternity services.<sup>14,19</sup> Indeed, the  
23  
24 facility delivery rate was found to be only 36.9%. In the traditional Nepalese society,  
25  
26 childbirth continues to take place at home, while many women still hold the view that facility  
27  
28 delivery is unnecessary. On the other hand, those women who were prepared and made  
29  
30 antenatal visits tended to give birth at facilities. Our results confirmed the strong contribution  
31  
32 by these need factors to actual facility utilisation irrespective of predisposing, enabling, and  
33  
34 external environment factors. Apart from the need factors, parity, wealth status and  
35  
36 residential location also play a significant role in the choice of delivery place.  
37  
38  
39  
40  
41  
42

43 Although the frequency of antenatal care visits was associated with subsequent facility  
44  
45 delivery, the relationship appeared to be dose-dependent,<sup>14, 18</sup> as in the case of the present  
46  
47 study whereby making a single visit induced no significant impact; whereas previous studies  
48  
49 undertaken in Tanzania observed high use of antenatal care but low use of facility delivery.<sup>20,</sup>

50  
51 <sup>21</sup> Making the recommended four or more antenatal care visits might reflect the woman's  
52  
53 concern of her pregnancy, pregnancy complications and the need for professional help.<sup>14, 22</sup>  
54  
55  
56  
57  
58  
59  
60

1  
2  
3 Consequently, informing women about danger signs and providing quality antenatal care with  
4 provision of iron tablets and blood check might encourage women to attend antenatal visits.  
5  
6  
7

8  
9  
10 The link between birth preparedness activities and facility delivery was supported by recent  
11 literature. A prospective cohort study of 701 pregnant women in the Kaski district of Nepal  
12 found preparation activities could increase the facility delivery rate.<sup>18</sup> Similarly, a  
13 randomised trial in Tanzania demonstrated that skilled delivery care uptake was 16.8% higher  
14 among women who had been counselled on promotion of birth plan than others without such  
15 counselling.<sup>23</sup> Raising awareness and help for birth plan also led to increased facility  
16 utilisation in other intervention studies conducted in Burkina Faso, Bangladesh and Eritrea.  
17  
18  
19  
20  
21  
22  
23  
24  
25  
26  
27  
28  
29  
30  
31  
32  
33  
34  
35  
36  
37  
38  
39  
40  
41  
42  
43  
44  
45  
46  
47  
48  
49  
50  
51  
52  
53  
54  
55  
56  
57  
58  
59  
60  
24-26. However, two pre-post evaluation studies of birth preparedness in southern districts of  
Nepal reported that increased preparedness level was not significantly translated into  
increased facility delivery.<sup>27, 28</sup>

The findings have important implications for safe motherhood program in Nepal and other  
low income countries. Because the intention to deliver at a health facility can be largely  
influenced by need factors, women should be extensively counselled and convinced of the  
benefits and safety of facility delivery. Any behavioural intervention such as birth  
preparedness package and complication readiness is unlikely to be successful unless attaining  
a high level capable to change the women's attitude and intention. Counselling can be  
performed by health professionals, preferably female health workers at a health facility or by  
female community health volunteers at household visits. Further, local teachers and social  
workers can be involved in awareness raising campaigns. Community networks and mother  
clubs can also provide support in terms of money and transport management.



1  
2  
3 The strength of the present study was the use of a nationally representative large sample of  
4  
5 married women with a high response rate. However, information was lacking on some known  
6  
7 determinants of facility delivery utilisation, particularly quality of providers and distance and  
8  
9 transportation to facility. These variables were unavailable from the NDHS 2011 database  
10  
11 and posed as the major limitation. Nevertheless, the external factors 'residential location' and  
12  
13 'region' have provided some proxy information to partially compensate the effect of distance  
14  
15 and service availability. Institutional delivery services in Terai and urban areas are more  
16  
17 physically accessible than in hilly or mountainous parts of the country. The regression model  
18  
19 has accounted for region and location as well as other known predisposing and enabling  
20  
21 factors.  
22  
23  
24  
25  
26

## 27 CONCLUSION

28  
29 Utilisation of institutional delivery services remained low in Nepal. The majority of mothers  
30  
31 were not prepared for childbirth and only half the women made the recommended four or  
32  
33 more antenatal care visits, indicating their perceived lack of need for facility delivery. The  
34  
35 national data confirmed the strong associations between such need factors and institutional  
36  
37 delivery service utilisation. This has implications for behavioural interventions such as birth  
38  
39 preparedness and complication readiness, which aim to change their intention to deliver at a  
40  
41 health facility. **Birth preparedness packages in Nepal should be continued and future**  
42  
43 **interventions should target the need factors.**  
44  
45  
46  
47  
48  
49  
50  
51  
52  
53  
54  
55  
56  
57  
58  
59  
60

### **Acknowledgements**

The authors are grateful to the ICF International, Calverton, Maryland, USA, for providing the data for this study.

### **Contributors**

RK conceived the study design, performed data analysis and drafted the manuscript. AHL supervised the statistical analysis and revised the paper. VK prepared the data set and assisted with interpretation of the data. All three authors have read and approved the final version for publication.

### **Competing Interests**

None declared for all authors.

### **Data sharing statement**

Data of 2011 Nepal Demographic and Health Survey can be obtained from MEASURE DHS ICF International, Calverton, Maryland, USA.

## REFERENCES

1. World Health Organization. *Trends in maternal mortality 1990 to 2010*. WHO, UNICEF, UNFPA and World Bank. WHO, Geneva, Switzerland,2012.
2. Ronsmans C, Graham WJ. Maternal mortality: who, when, where, and why. *The Lancet* 2006;368(9542):1189-200.
3. United Nations. *The Millenium Development goals Report 2013*. New York: United Nations,2013.
4. Metcalfe R, Adegoke AA. Strategies to increase facility-based skilled birth attendance in South Asia: a literature review. *International Health* 2013;5(2):96-105.
5. De Brouwere V, Richard F, Witter S. Access to maternal and perinatal health services: lessons from successful and less successful examples of improving access to safe delivery and care of the newborn. *Trop Med Int Health* 2010;15(8):901-9.
6. Karkee R, Lee A, Binns C. Determinants of facility delivery after implementation of safer mother programme in Nepal: a prospective cohort study. *BMC Pregnancy Childbirth* 2013;13(1):193.
7. Karkee R. How did Nepal reduce the maternal mortality? A result from analysing the determinants of maternal mortality. *Journal of Nepal Medical Association* 2012;52(186):88-94.
8. MoHP [Nepal], New ERA, ICF International Inc. *Nepal Demographic and Health Survey 2011*. Kathmandu, Nepal and Calverton, Maryland: Ministry of Health and Population [Nepal], New ERA, and ICF International Inc.,2012.
9. National Planning Commission/UN Country Team of Nepal. *Nepal Millennium Development Goals Progress Report 2010*. Kathmandu: National Planning Commission, Government of Nepal/UN Country Team of Nepal,2010.

- 1  
2  
3 10. Andersen RM. Revisiting the Behavioral Model and Access to Medical Care: Does it  
4  
5 Matter? *J Health Soc Behav* 1995;36(1):1-10.  
6  
7 11. Thaddeus S, Maine D. Too far to walk: Maternal mortality in context. *Social Science*  
8  
9 *and Medicine* 1994;38(8):1091-110.  
10  
11 12. Pradhan A, Suvedi BK, Barnett S, et al. Nepal Maternal Mortality and Morbidity  
12  
13 Study 2008/2009.: Ministry of Health and Population, Government of Nepal,  
14  
15 Kathmandu,2010.  
16  
17 13. Agus Y, Shigeko H, Porter SE. Rural Indonesia women's traditional beliefs about  
18  
19 antenatal care. *BMC Res Notes* 2012589.  
20  
21 14. Gabrysch S, Campbell OMR. Still too far to walk: Literature review of the  
22  
23 determinants of delivery service use. *BMC Pregnancy Childbirth* 2009;934.  
24  
25 15. JHPIEGO. *Behaviour change intervention for safe motherhood: common problems,*  
26  
27 *unique solutions.* Baltimore: JHPIEGO, Maternal and Neonatal Health  
28  
29 Programme,2004.  
30  
31 16. MEASURE DHS/ ICF International.  
32  
33 [http://www.measuredhs.com/data/dataset/Nepal\\_Standard-DHS\\_2011.cfm?flag=0](http://www.measuredhs.com/data/dataset/Nepal_Standard-DHS_2011.cfm?flag=0)  
34  
35 (accessed 15 Jan 2014),  
36  
37 17. JHPIEGO. Monitoring birth preparedness and complication readiness, tools and  
38  
39 indicators for maternal and newborn health. Baltimore: JHPIEGO, Maternal and  
40  
41 Neonatal Health Programme; 2004.  
42  
43 18. Karkee R, Lee A, Binns C. Birth preparedness and skilled attendance at birth in  
44  
45 Nepal: Implications for achieving Millennium Development Goal 5. *Midwifery*  
46  
47 2013;29(10):1206-10.  
48  
49 19. Acharya LB, Cleland J. Maternal and child health services in rural Nepal: does access  
50  
51 or quality matter more? *Health Policy Plan* 2000;15(2):223-29.  
52  
53  
54  
55  
56  
57  
58  
59  
60

- 1  
2  
3 20. Mpembeni RNM, Killewo JZ, Leshabari MT, et al. Use pattern of maternal health  
4 services and determinants of skilled care during delivery in Southern Tanzania:  
5 Implications for achievement of MDG-5 targets. *BMC Pregnancy Childbirth* 2007;7.  
6  
7  
8  
9  
10 21. Magoma M, Requejo J, Campbell O, Cousens S, Filippi V. High ANC coverage and  
11 low skilled attendance in a rural Tanzanian district: a case for implementing a birth  
12 plan intervention. *BMC Pregnancy Childbirth* 2010;10(1):13.  
13  
14  
15  
16 22. Titaley C, Dibley M, Roberts C. Factors associated with underutilization of antenatal  
17 care services in Indonesia: results of Indonesia Demographic and Health Survey  
18 2002/2003 and 2007. *BMC Public Health* 2010;10(1):485.  
19  
20  
21  
22  
23 23. Magoma M, Requejo J, Campbell O, Cousens S, Merialdi M, Filippi V. The  
24 effectiveness of birth plans in increasing use of skilled care at delivery and postnatal  
25 care in rural Tanzania: a cluster randomised trial. *Trop Med Int Health*  
26 2013;18(4):435-43.  
27  
28  
29  
30  
31  
32 24. Brazier E, Andrzejewski C, Perkins ME, Themmen EM, Knight RJ, Bassane B.  
33 Improving poor women's access to maternity care: Findings from a primary care  
34 intervention in Burkina Faso. *Social Science and Medicine* 2009;69(5):682-90.  
35  
36  
37  
38 25. Hossain J, Ross SR. The effect of addressing demand for as well as supply of  
39 emergency obstetric care in Dinajpur, Bangladesh. *International Journal of*  
40 *Gynecology & Obstetrics* 2006;92(3):320-28.  
41  
42  
43  
44  
45 26. Turan JM, Tesfagiorgis M, Polan ML. Evaluation of a Community Intervention for  
46 Promotion of Safe Motherhood in Eritrea. *The Journal of Midwifery & Women's*  
47 *Health* 2011;56(1):8-17.  
48  
49  
50  
51  
52 27. McPherson R, Khadka N, Moore J, Sharma M. Are birth-preparedness programmes  
53 effective? Results from a field trial in Siraha district, Nepal. *Journal Health*  
54 *Population Nutrition* 2006;24479-88.  
55  
56  
57  
58  
59  
60

- 1  
2  
3 28. Hodgins S, McPherson R, Suvedi BK, et al. Testing a scalable community-based  
4 approach to improve maternal and neonatal health in rural Nepal. *J Perinatol*  
5  
6 2010;30(6):388-95.  
7  
8  
9  
10  
11  
12  
13  
14  
15  
16  
17  
18  
19  
20  
21  
22  
23  
24  
25  
26  
27  
28  
29  
30  
31  
32  
33  
34  
35  
36  
37  
38  
39  
40  
41  
42  
43  
44  
45  
46  
47  
48  
49  
50  
51  
52  
53  
54  
55  
56  
57  
58  
59  
60

For peer review only

1  
2  
3  
4  
5  
6  
7  
8  
9  
10  
11  
12  
13  
14  
15  
16  
17  
18  
19  
20  
21  
22  
23  
24  
25  
26  
27  
28  
29  
30  
31  
32  
33  
34  
35  
36  
37  
38  
39  
40  
41  
42  
43  
44  
45  
46  
47  
48  
49  
50  
51  
52  
53  
54  
55  
56  
57  
58  
59  
60

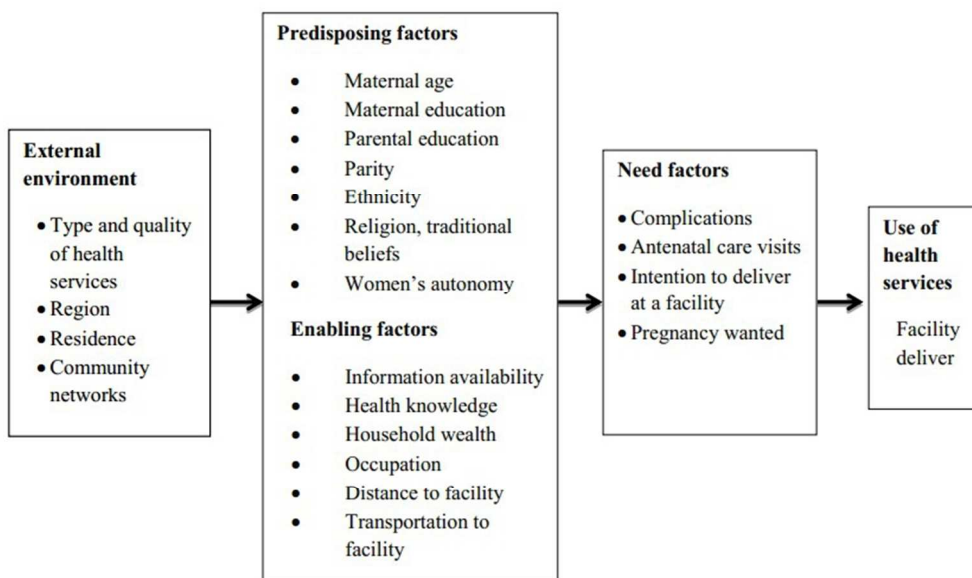

Conceptual framework of factors associated with the utilisation of institutional delivery services  
223x131mm (96 x 96 DPI)

review only
